# Supplementary material for: Structure, Spectra and Photochemistry of 2-Amino-4-Methylthiazole: FTIR Matrix Isolation and Theoretical Studies
Source: MDPI journal article supplement (doi:10.3390/molecules27123897), 2022-06-17
Supplement: s1 [file s1]

## Supplementary Materials

### Structure, Spectra and Photochemistry of 2-amino-4-methylthiazole:

#### FTIR Matrix Isolation and Theoretical Studies

Magdalena Pagacz-Kostrzewa <sup>1</sup>, Daria Bumażnik <sup>1</sup>, Stéphane Coussan <sup>2,\*</sup> and Magdalena Sałdyka <sup>1,\*</sup>

<sup>1</sup>*Faculty of Chemistry, University of Wrocław, F. Joliot-Curie 14, 50-383 Wrocław, Poland* <sup>2</sup>*Aix-*

*Marseille Université, CNRS, PIIM, Marseille, France*

**Table S1.** Selected structural parameters calculated for 2-amino-4-methylthiazole (AMT) tautomers at the B3LYP/6-311++G(3df,3pd) level of theory. The bond distances are given in Å, the angles in degrees. E.g. see Scheme 1 for labels

| Property                                                         | AMT1   | AMT2   | AMT2'  | AMT3   | AMT3'  | AMT4   | AMT4'  | AMT5   |
|------------------------------------------------------------------|--------|--------|--------|--------|--------|--------|--------|--------|
| r(S <sub>1</sub> -C <sub>2</sub> )                               | 1.751  | 1.792  | 1.781  | 1.794  | 1.816  | 1.788  | 1.778  | 1.784  |
| r(C <sub>2</sub> -N <sub>3</sub> )                               | 1.297  | 1.381  | 1.388  | 1.414  | 1.407  | 1.378  | 1.387  | 1.280  |
| r(N <sub>3</sub> -C <sub>4</sub> )                               | 1.381  | 1.387  | 1.392  | 1.274  | 1.272  | 1.385  | 1.389  | 1.390  |
| r(C <sub>4</sub> -C <sub>5</sub> )                               | 1.357  | 1.341  | 1.340  | 1.512  | 1.515  | 1.514  | 1.512  | 1.534  |
| r(C <sub>5</sub> -S <sub>1</sub> )                               | 1.737  | 1.758  | 1.756  | 1.810  | 1.807  | 1.831  | 1.830  | 1.825  |
| r(C <sub>2</sub> -N <sub>6</sub> )                               | 1.374  | 1.271  | 1.271  | 1.261  | 1.261  | 1.266  | 1.266  | 1.357  |
| r(C <sub>4</sub> -C <sub>9</sub> )                               | 1.494  | 1.491  | 1.491  | 1.493  | 1.493  | 1.333  | 1.333  | 1.334  |
| r(C <sub>5</sub> -H <sub>13</sub> )                              | 1.076  | 1.075  | 1.075  | 1.091  | 1.091  | 1.089  | 1.089  | 1.087  |
| r(C <sub>5</sub> -H <sub>14</sub> )                              |        |        |        | 1.091  | 1.091  | 1.086  | 1.086  | 1.088  |
| r(N <sub>6</sub> -H <sub>7</sub> )                               | 1.008  | -      | 1.016  | 1.018  | -      | -      | 1.017  | 1.007  |
| r(N <sub>6</sub> -H <sub>8</sub> )                               | 1.006  | 1.012  | -      | -      | 1.016  | 1.013  | -      | 1.004  |
| r(N <sub>3</sub> -H <sub>15</sub> )                              |        |        |        |        |        | 1.008  | 1.007  | -      |
| r(C <sub>9</sub> -H <sub>10</sub> )                              | 1.091  | 1.092  | 1.093  | 1.092  | 1.092  | -      | -      | -      |
| r(C <sub>9</sub> -H <sub>11</sub> )                              | 1.091  | 1.092  | 1.093  | 1.086  | 1.086  | 1.081  | 1.081  | 1.079  |
| r(C <sub>9</sub> -H <sub>12</sub> )                              | 1.088  | 1.088  | 1.087  | 1.092  | 1.092  | 1.078  | 1.078  | 1.080  |
| φ(S <sub>1</sub> -C <sub>2</sub> -N <sub>3</sub> )               | 114.6  | 106.5  | 106.8  | 111.9  | 111.1  | 108.8  | 109.1  | 117.9  |
| φ(C <sub>2</sub> -N <sub>3</sub> -C <sub>4</sub> )               | 111.4  | 117.5  | 117.1  | 113.7  | 114.3  | 119.7  | 119.1  | 113.4  |
| φ(N <sub>3</sub> -C <sub>4</sub> -C <sub>5</sub> )               | 115.2  | 112.7  | 112.4  | 118.6  | 118.9  | 110.1  | 109.8  | 113.7  |
| φ(C <sub>4</sub> -C <sub>5</sub> -S <sub>1</sub> )               | 110.3  | 111.8  | 112.2  | 105.0  | 104.8  | 106.6  | 106.6  | 105.8  |
| φ(C <sub>5</sub> -S <sub>1</sub> -C <sub>2</sub> )               | 88.5   | 91.5   | 91.5   | 90.8   | 91.0   | 92.6   | 92.6   | 88.9   |
| φ(N <sub>3</sub> -C <sub>4</sub> -C <sub>9</sub> )               | 118.8  | 119.2  | 119.2  | 122.1  | 122.0  | 125.4  | 125.2  | 123.5  |
| φ(N <sub>3</sub> -C <sub>2</sub> -N <sub>6</sub> )               | 123.7  | 123.0  | 130.6  | 126.5  | 122.0  | 122.4  | 129.5  | 123.8  |
| φ(S <sub>1</sub> -C <sub>2</sub> -N <sub>6</sub> )               | 121.6  | 130.5  | 122.5  | 121.7  | 127.0  | 128.8  | 121.4  | 118.2  |
| θ(S <sub>1</sub> C <sub>2</sub> N <sub>6</sub> H <sub>7</sub> )  | -166.8 | -      | -180.0 | 180.0  | -      | -      | -178.6 | -170.6 |
| θ(S <sub>1</sub> C <sub>2</sub> N <sub>6</sub> H <sub>8</sub> )  | -30.2  | 0.0    | -      | -      | 0.0    | -1.6   | -      | -21.2  |
| θ(N <sub>6</sub> C <sub>2</sub> N <sub>3</sub> C <sub>4</sub> )  | 176.7  | 180.0  | 180.0  | -180.0 | 180.0  | 174.8  | -174.1 | 176.8  |
| θ(C <sub>2</sub> N <sub>3</sub> C <sub>4</sub> C <sub>9</sub> )  | -180.0 | -180.0 | -180.0 | -180.0 | -180.0 | -168.0 | 166.0  | -176.0 |
| θ(N <sub>3</sub> C <sub>4</sub> C <sub>5</sub> H <sub>13</sub> ) | 179.2  | 180.0  | -180.0 | -120.4 | -120.2 | -135.3 | -101.2 | -123.3 |
| θ(N <sub>3</sub> C <sub>4</sub> C <sub>5</sub> S <sub>1</sub> )  | -0.6   | 0.0    | 0.0    | 0.0    | 0.0    | -15.3  | 17.4   | -6.2   |

|                                                       |       |       |       |       |       |        |        |       |
|-------------------------------------------------------|-------|-------|-------|-------|-------|--------|--------|-------|
| $\theta(\text{S}_1\text{C}_2\text{N}_3\text{C}_4)$    | 0.0   | 0.0   | 0.0   | 0.0   | 0.0   | -4.4   | 5.3    | -0.5  |
| $\theta(\text{S}_1\text{C}_5\text{C}_4\text{C}_9)$    | 179.8 | 180.0 | 180.0 | 180.0 | 180.0 | 166.2  | -164.0 | 174.4 |
| $\theta(\text{S}_1\text{C}_2\text{N}_3\text{H}_{15})$ | -     | -     | -     | -     | -     | -173.2 | 170.7  | -     |

**Table S2.** Harmonic wavenumbers, scaled wavenumbers<sup>a</sup> (cm<sup>-1</sup>) and intensities (km mol<sup>-1</sup>) of 2-amino-4-methylthiazole photoproducts calculated at the B3LYP/6-311++G(3df,3pd) level of theory.

| AMTfp1a         |                       |      | AMTfp1s         |                       |      | AMTfp2a         |                       |      | AMTfp2s         |                       |     | AMTfp3          |                       |      |
|-----------------|-----------------------|------|-----------------|-----------------------|------|-----------------|-----------------------|------|-----------------|-----------------------|-----|-----------------|-----------------------|------|
| $\tilde{\nu}_h$ | $\tilde{\nu}_{scal.}$ | I    | $\tilde{\nu}_h$ | $\tilde{\nu}_{scal.}$ | I    | $\tilde{\nu}_h$ | $\tilde{\nu}_{scal.}$ | I    | $\tilde{\nu}_h$ | $\tilde{\nu}_{scal.}$ | I   | $\tilde{\nu}_h$ | $\tilde{\nu}_{scal.}$ | I    |
| 3571            | 3443                  | 69   | 3579            | 3450                  | 79   | 3584            | 3455                  | 89   | 3591            | 3461                  | 82  | 3586            | 3457                  | 91   |
| 3203            | 3087                  | 3    | 3218            | 3102                  | 5    | 3122            | 3010                  | 13   | 3126            | 3014                  | 10  | 3203            | 3087                  | 1    |
| 3119            | 3007                  | 8    | 3117            | 3005                  | 14   | 3116            | 3003                  | 13   | 3117            | 3005                  | 18  | 3134            | 3021                  | 11   |
| 3072            | 2961                  | 11   | 3063            | 2952                  | 14   | 3088            | 2977                  | 13   | 3077            | 2967                  | 22  | 3113            | 3001                  | 12   |
| 3023            | 2914                  | 16   | 3017            | 2909                  | 29   | 3058            | 2948                  | 5    | 3045            | 2935                  | 15  | 3102            | 2990                  | 10   |
| 2686            | 2589                  | 0    | 2694            | 2597                  | 1    | 3041            | 2931                  | 13   | 2957            | 2850                  | 15  | 3036            | 2927                  | 19   |
| 2217            | 2168                  | 1339 | 2221            | 2172                  | 1332 | 2221            | 2172                  | 1185 | 2219            | 2170                  | 949 | 2233            | 2184                  | 1035 |
| 1665            | 1629                  | 18   | 1673            | 1636                  | 30   | 1496            | 1463                  | 4    | 1501            | 1468                  | 5   | 1497            | 1464                  | 2    |
| 1486            | 1453                  | 8    | 1488            | 1455                  | 8    | 1488            | 1456                  | 7    | 1489            | 1456                  | 8   | 1487            | 1454                  | 5    |
| 1481            | 1448                  | 3    | 1477            | 1445                  | 8    | 1414            | 1383                  | 21   | 1418            | 1387                  | 13  | 1476            | 1443                  | 7    |
| 1424            | 1392                  | 14   | 1430            | 1399                  | 10   | 1401            | 1370                  | 14   | 1410            | 1379                  | 18  | 1426            | 1395                  | 48   |
| 1416            | 1385                  | 3    | 1418            | 1387                  | 1    | 1380            | 1350                  | 23   | 1363            | 1333                  | 32  | 1417            | 1386                  | 2    |
| 1312            | 1283                  | 5    | 1291            | 1263                  | 24   | 1333            | 1303                  | 26   | 1314            | 1285                  | 26  | 1282            | 1253                  | 16   |
| 1139            | 1114                  | 43   | 1154            | 1128                  | 19   | 1282            | 1253                  | 31   | 1279            | 1251                  | 2   | 1204            | 1177                  | 46   |
| 1062            | 1039                  | 1    | 1065            | 1042                  | 1    | 1167            | 1142                  | 6    | 1170            | 1144                  | 14  | 1089            | 1065                  | 26   |
| 1027            | 1004                  | 18   | 1051            | 1028                  | 21   | 1106            | 1082                  | 22   | 1105            | 1080                  | 30  | 1075            | 1051                  | 12   |
| 966             | 945                   | 11   | 970             | 949                   | 14   | 1085            | 1061                  | 58   | 1077            | 1054                  | 30  | 990             | 969                   | 2    |
| 922             | 902                   | 444  | 912             | 892                   | 406  | 1025            | 1002                  | 25   | 1012            | 990                   | 21  | 943             | 922                   | 12   |
| 855             | 836                   | 16   | 856             | 837                   | 48   | 932             | 912                   | 313  | 927             | 907                   | 313 | 924             | 904                   | 52   |
| 847             | 828                   | 42   | 806             | 788                   | 19   | 893             | 873                   | 6    | 892             | 873                   | 3   | 913             | 893                   | 237  |
| 768             | 751                   | 16   | 746             | 746                   | 36   | 862             | 843                   | 18   | 854             | 835                   | 15  | 777             | 760                   | 32   |
| 649             | 649                   | 24   | 631             | 631                   | 15   | 835             | 817                   | 7    | 759             | 742                   | 19  | 656             | 656                   | 27   |
| 579             | 579                   | 42   | 606             | 606                   | 31   | 644             | 644                   | 17   | 655             | 655                   | 33  | 614             | 614                   | 81   |
| 489             | 489                   | 35   | 513             | 513                   | 26   | 595             | 595                   | 53   | 615             | 615                   | 15  | 593             | 593                   | 15   |
| 447             | 447                   | 4    | 505             | 505                   | 5    | 483             | 483                   | 55   | 524             | 524                   | 20  | 554             | 554                   | 9    |
| 423             | 423                   | 50   | 421             | 421                   | 72   | 438             | 438                   | 17   | 452             | 452                   | 53  | 476             | 476                   | 39   |
| 360             | 360                   | 1    | 368             | 368                   | 1    | 349             | 349                   | 13   | 426             | 426                   | 27  | 405             | 405                   | 43   |
| 266             | 266                   | 9    | 251             | 251                   | 6    | 343             | 343                   | 17   | 336             | 336                   | 2   | 379             | 379                   | 18   |
| 232             | 232                   | 1    | 208             | 208                   | 9    | 293             | 293                   | 6    | 250             | 250                   | 5   | 331             | 331                   | 8    |
| 154             | 154                   | 16   | 189             | 189                   | 5    | 233             | 233                   | 1    | 234             | 234                   | 2   | 286             | 286                   | 3    |
| 127             | 127                   | 22   | 159             | 159                   | 2    | 143             | 143                   | 3    | 129             | 129                   | 7   | 233             | 233                   | 0    |
| 112             | 112                   | 2    | 98              | 98                    | 1    | 78              | 78                    | 4    | 98              | 98                    | 1   | 107             | 107                   | 1    |
| 63              | 63                    | 2    | 83              | 83                    | 11   | 21              | 21                    | 3    | 62              | 62                    | 7   | 31              | 31                    | 8    |
| AMTfp4          |                       |      | AMTfp5          |                       |      | AMTfp6          |                       |      | AMTfp7          |                       |     | AMTfp8          |                       |      |
| $\tilde{\nu}_h$ | $\tilde{\nu}_{scal.}$ | I    | $\tilde{\nu}_h$ | $\tilde{\nu}_{scal.}$ | I    | $\tilde{\nu}_h$ | $\tilde{\nu}_{scal.}$ | I    | $\tilde{\nu}_h$ | $\tilde{\nu}_{scal.}$ | I   | $\tilde{\nu}_h$ | $\tilde{\nu}_{scal.}$ | I    |
| 3604            | 3474                  | 40   | 3707            | 3574                  | 51   | 3704            | 3570                  | 69   | 3701            | 3568                  | 51  | 3691            | 3558                  | 48   |
| 3198            | 3083                  | 6    | 3582            | 3453                  | 20   | 3581            | 3452                  | 108  | 3584            | 3455                  | 52  | 3575            | 3446                  | 68   |
| 3117            | 3005                  | 14   | 3132            | 3020                  | 16   | 3129            | 3017                  | 9    | 3105            | 2993                  | 23  | 3247            | 3130                  | 3    |
| 3116            | 3004                  | 25   | 3119            | 3007                  | 11   | 3075            | 2964                  | 3    | 3102            | 2991                  | 11  | 3157            | 3043                  | 0    |
| 3077            | 2967                  | 12   | 3080            | 2969                  | 13   | 3027            | 2918                  | 1    | 3040            | 2930                  | 23  | 3094            | 2983                  | 3    |
| 3027            | 2918                  | 24   | 3025            | 2916                  | 29   | 2533            | 2442                  | 74   | 3033            | 2924                  | 16  | 2663            | 2567                  | 3    |
| 1658            | 1621                  | 120  | 1787            | 1748                  | 170  | 1712            | 1674                  | 497  | 1685            | 1648                  | 399 | 1764            | 1725                  | 3    |
| 1626            | 1590                  | 19   | 1700            | 1662                  | 357  | 1597            | 1562                  | 27   | 1604            | 1569                  | 5   | 1657            | 1621                  | 527  |
| 1483            | 1451                  | 13   | 1627            | 1591                  | 28   | 1581            | 1546                  | 60   | 1493            | 1460                  | 7   | 1603            | 1567                  | 88   |
| 1469            | 1437                  | 7    | 1485            | 1453                  | 6    | 1462            | 1429                  | 9    | 1489            | 1456                  | 6   | 1443            | 1411                  | 32   |

| 1413          | 1381                | 3   | 1473          | 1440                | 6   | 1454          | 1422                | 49  | 1443          | 1411                | 12  | 1410          | 1379                | 72  |
|---------------|---------------------|-----|---------------|---------------------|-----|---------------|---------------------|-----|---------------|---------------------|-----|---------------|---------------------|-----|
| 1407          | 1376                | 13  | 1428          | 1396                | 7   | 1396          | 1365                | 45  | 1408          | 1377                | 7   | 1230          | 1203                | 27  |
| 1371          | 1341                | 73  | 1401          | 1370                | 8   | 1317          | 1288                | 105 | 1349          | 1319                | 38  | 1188          | 1162                | 30  |
| 1297          | 1269                | 9   | 1256          | 1229                | 68  | 1202          | 1175                | 54  | 1292          | 1264                | 132 | 1158          | 1133                | 1   |
| 1165          | 1139                | 14  | 1180          | 1155                | 27  | 1152          | 1127                | 29  | 1229          | 1202                | 20  | 1105          | 1081                | 1   |
| 1092          | 1068                | 39  | 1148          | 1123                | 73  | 1037          | 1015                | 4   | 1137          | 1112                | 17  | 1023          | 1001                | 23  |
| 1066          | 1043                | 3   | 1072          | 1048                | 11  | 982           | 960                 | 6   | 1103          | 1079                | 11  | 957           | 936                 | 20  |
| 1040          | 1018                | 5   | 1044          | 1021                | 2   | 944           | 924                 | 43  | 1067          | 1043                | 12  | 908           | 888                 | 6   |
| 944           | 923                 | 2   | 961           | 940                 | 7   | 927           | 907                 | 45  | 1056          | 1033                | 5   | 865           | 846                 | 51  |
| 921           | 901                 | 8   | 938           | 918                 | 14  | 805           | 787                 | 31  | 918           | 897                 | 12  | 832           | 813                 | 6   |
| 838           | 819                 | 4   | 721           | 721                 | 7   | 740           | 740                 | 13  | 851           | 833                 | 14  | 776           | 758                 | 3   |
| 789           | 772                 | 8   | 645           | 645                 | 6   | 599           | 599                 | 2   | 767           | 750                 | 6   | 728           | 728                 | 0   |
| 748           | 748                 | 15  | 607           | 607                 | 3   | 564           | 564                 | 10  | 690           | 690                 | 4   | 666           | 666                 | 5   |
| 710           | 710                 | 5   | 563           | 563                 | 4   | 531           | 531                 | 10  | 579           | 579                 | 0   | 606           | 606                 | 19  |
| 640           | 640                 | 2   | 506           | 506                 | 2   | 498           | 498                 | 7   | 519           | 519                 | 6   | 528           | 528                 | 3   |
| 507           | 507                 | 22  | 382           | 382                 | 4   | 486           | 486                 | 2   | 479           | 479                 | 3   | 483           | 483                 | 33  |
| 477           | 477                 | 31  | 326           | 326                 | 24  | 380           | 380                 | 167 | 423           | 423                 | 10  | 452           | 452                 | 53  |
| 422           | 422                 | 9   | 275           | 275                 | 123 | 338           | 338                 | 17  | 329           | 329                 | 166 | 380           | 380                 | 193 |
| 338           | 338                 | 10  | 247           | 247                 | 17  | 245           | 245                 | 9   | 296           | 296                 | 66  | 299           | 299                 | 2   |
| 261           | 261                 | 31  | 193           | 193                 | 4   | 191           | 191                 | 2   | 212           | 212                 | 3   | 215           | 215                 | 10  |
| 232           | 232                 | 32  | 163           | 163                 | 0   | 160           | 160                 | 2   | 202           | 202                 | 1   | 180           | 180                 | 2   |
| 179           | 179                 | 4   | 105           | 105                 | 1   | 128           | 128                 | 3   | 172           | 172                 | 2   | 141           | 141                 | 7   |
| 149           | 149                 | 3   | 71            | 71                  | 8   | 75            | 75                  | 14  | 87            | 87                  | 7   | 123           | 123                 | 8   |
| AMTfp9a       |                     |     | AMTfp9s       |                     |     | AMTfp10a      |                     |     | AMTfp10s      |                     |     | AMTfp15       |                     |     |
| $\tilde{v}_h$ | $\tilde{v}_{scal.}$ | $l$ |
| 3717          | 3583                | 48  | 3696          | 3563                | 37  | 3716          | 3583                | 69  | 3672          | 3540                | 55  | 3518          | 3391                | 7   |
| 3584          | 3455                | 56  | 3582          | 3453                | 30  | 3580          | 3451                | 54  | 3544          | 3416                | 30  | 3324          | 3204                | 18  |
| 3255          | 3137                | 2   | 3252          | 3135                | 2   | 3239          | 3122                | 7   | 3239          | 3122                | 7   | 3121          | 3008                | 6   |
| 3160          | 3046                | 2   | 3158          | 3044                | 2   | 3166          | 3052                | 2   | 3151          | 3038                | 3   | 3093          | 2982                | 4   |
| 3096          | 2985                | 14  | 3130          | 3017                | 25  | 3148          | 3035                | 2   | 3145          | 3031                | 3   | 3030          | 2921                | 15  |
| 3093          | 2982                | 22  | 3092          | 2981                | 15  | 3129          | 3017                | 21  | 3131          | 3018                | 21  | 2675          | 2579                | 2   |
| 1727          | 1689                | 585 | 1739          | 1701                | 416 | 1646          | 1610                | 254 | 1657          | 1620                | 186 | 1920          | 1878                | 14  |
| 1635          | 1599                | 15  | 1643          | 1607                | 50  | 1626          | 1590                | 162 | 1634          | 1598                | 39  | 1653          | 1617                | 175 |
| 1616          | 1580                | 101 | 1617          | 1582                | 43  | 1580          | 1545                | 1   | 1584          | 1549                | 53  | 1483          | 1450                | 7   |
| 1456          | 1424                | 14  | 1463          | 1431                | 11  | 1448          | 1416                | 9   | 1448          | 1416                | 7   | 1463          | 1431                | 12  |
| 1397          | 1367                | 56  | 1424          | 1393                | 42  | 1392          | 1361                | 55  | 1384          | 1353                | 92  | 1403          | 1372                | 5   |
| 1333          | 1304                | 37  | 1332          | 1303                | 36  | 1363          | 1333                | 112 | 1360          | 1330                | 11  | 1255          | 1227                | 304 |
| 1320          | 1291                | 36  | 1310          | 1282                | 59  | 1324          | 1295                | 20  | 1331          | 1302                | 41  | 1130          | 1105                | 68  |
| 1296          | 1268                | 153 | 1263          | 1235                | 61  | 1238          | 1211                | 12  | 1210          | 1183                | 8   | 1059          | 1036                | 3   |
| 1137          | 1112                | 33  | 1109          | 1085                | 80  | 1099          | 1075                | 104 | 1100          | 1075                | 126 | 1042          | 1019                | 43  |
| 1101          | 1077                | 83  | 1091          | 1067                | 27  | 1074          | 1050                | 6   | 1079          | 1055                | 0   | 1022          | 999                 | 32  |
| 1001          | 979                 | 3   | 991           | 969                 | 6   | 1010          | 988                 | 47  | 1019          | 997                 | 41  | 944           | 924                 | 1   |
| 951           | 930                 | 27  | 945           | 925                 | 13  | 967           | 946                 | 12  | 948           | 927                 | 12  | 914           | 893                 | 11  |
| 932           | 912                 | 43  | 934           | 913                 | 45  | 902           | 882                 | 18  | 915           | 895                 | 29  | 861           | 842                 | 67  |
| 892           | 872                 | 0   | 893           | 873                 | 0   | 886           | 867                 | 73  | 912           | 892                 | 33  | 841           | 822                 | 57  |
| 838           | 819                 | 10  | 806           | 788                 | 17  | 843           | 824                 | 11  | 900           | 880                 | 7   | 753           | 736                 | 33  |
| 709           | 709                 | 5   | 739           | 739                 | 3   | 756           | 740                 | 2   | 749           | 749                 | 7   | 700           | 700                 | 2   |
| 604           | 604                 | 3   | 663           | 663                 | 14  | 607           | 607                 | 15  | 676           | 676                 | 4   | 649           | 649                 | 37  |
| 598           | 598                 | 4   | 652           | 652                 | 5   | 598           | 598                 | 4   | 605           | 605                 | 9   | 540           | 540                 | 4   |
| 579           | 579                 | 37  | 525           | 525                 | 17  | 544           | 544                 | 2   | 549           | 549                 | 5   | 462           | 462                 | 8   |
| 512           | 512                 | 6   | 509           | 509                 | 5   | 496           | 496                 | 3   | 498           | 498                 | 7   | 408           | 408                 | 3   |
| 391           | 391                 | 0   | 417           | 417                 | 49  | 433           | 433                 | 11  | 417           | 417                 | 152 | 344           | 344                 | 4   |
| 321           | 321                 | 236 | 399           | 399                 | 179 | 293           | 293                 | 50  | 372           | 372                 | 6   | 269           | 269                 | 9   |
| 273           | 273                 | 9   | 295           | 295                 | 2   | 252           | 252                 | 102 | 292           | 292                 | 8   | 251           | 251                 | 22  |
| 212           | 212                 | 3   | 197           | 197                 | 1   | 245           | 245                 | 6   | 250           | 250                 | 3   | 241           | 241                 | 4   |
| 146           | 146                 | 4   | 156           | 156                 | 4   | 207           | 207                 | 29  | 181           | 181                 | 3   | 159           | 159                 | 0   |
| 116           | 116                 | 4   | 144           | 144                 | 2   | 130           | 130                 | 2   | 120           | 120                 | 1   | 137           | 137                 | 4   |
| 107           | 107                 | 8   | 51            | 51                  | 8   | 78            | 78                  | 1   | 72            | 72                  | 0   | 41            | 41                  | 2   |
| AMTfp16       |                     |     | AMTfp17       |                     |     | AMTfp18       |                     |     | AMTfp19       |                     |     | AMTfp20       |                     |     |

| $\tilde{v}_h$ | $\tilde{v}_{scal.}$ | $I$ |
|---------------|---------------------|-----|---------------|---------------------|-----|---------------|---------------------|-----|---------------|---------------------|-----|---------------|---------------------|-----|
| 3528          | 3401                | 30  | 3712          | 3578                | 55  | 3706          | 3573                | 49  | 3670          | 3538                | 47  | 3726          | 3592                | 76  |
| 3252          | 3135                | 1   | 3569          | 3441                | 54  | 3573          | 3445                | 48  | 3542          | 3414                | 29  | 3619          | 3489                | 53  |
| 3161          | 3047                | 3   | 3342          | 3222                | 22  | 3258          | 3141                | 1   | 3281          | 3163                | 5   | 3591          | 3462                | 43  |
| 3129          | 3017                | 11  | 3113          | 3001                | 4   | 3179          | 3064                | 8   | 3063          | 2953                | 50  | 3292          | 3174                | 14  |
| 3079          | 2969                | 9   | 3079          | 2969                | 5   | 3165          | 3051                | 0   | 2998          | 2890                | 79  | 3091          | 2980                | 37  |
| 3029          | 2920                | 11  | 3026          | 2917                | 14  | 3089          | 2978                | 19  | 2675          | 2579                | 2   | 3027          | 2918                | 90  |
| 1822          | 1781                | 345 | 1945          | 1902                | 6   | 1842          | 1802                | 168 | 1842          | 1801                | 126 | 1843          | 1803                | 164 |
| 1679          | 1642                | 25  | 1613          | 1577                | 206 | 1625          | 1589                | 166 | 1659          | 1622                | 418 | 1636          | 1600                | 189 |
| 1492          | 1459                | 12  | 1478          | 1445                | 7   | 1494          | 1461                | 5   | 1607          | 1572                | 241 | 1532          | 1498                | 231 |
| 1476          | 1444                | 11  | 1469          | 1436                | 11  | 1450          | 1418                | 27  | 1511          | 1478                | 19  | 1515          | 1481                | 156 |
| 1444          | 1412                | 4   | 1410          | 1379                | 3   | 1375          | 1345                | 349 | 1311          | 1283                | 158 | 1417          | 1386                | 156 |
| 1412          | 1381                | 10  | 1388          | 1357                | 233 | 1348          | 1319                | 380 | 1179          | 1153                | 9   | 1307          | 1278                | 226 |
| 1278          | 1250                | 66  | 1272          | 1244                | 110 | 1218          | 1191                | 39  | 1118          | 1093                | 1   | 1193          | 1167                | 51  |
| 1166          | 1140                | 170 | 1084          | 1060                | 66  | 1148          | 1122                | 2   | 1091          | 1067                | 2   | 1109          | 1085                | 1   |
| 1093          | 1069                | 79  | 1058          | 1034                | 0   | 1106          | 1082                | 4   | 1059          | 1036                | 51  | 1097          | 1073                | 35  |
| 1074          | 1050                | 4   | 1042          | 1019                | 19  | 1075          | 1051                | 5   | 1031          | 1008                | 6   | 1082          | 1058                | 47  |
| 1019          | 997                 | 1   | 1007          | 985                 | 49  | 1024          | 1002                | 1   | 999           | 977                 | 2   | 1018          | 996                 | 1   |
| 942           | 921                 | 2   | 905           | 885                 | 55  | 971           | 950                 | 34  | 962           | 941                 | 19  | 1010          | 988                 | 4   |
| 925           | 905                 | 42  | 896           | 876                 | 16  | 918           | 898                 | 57  | 947           | 926                 | 17  | 1000          | 978                 | 114 |
| 846           | 827                 | 21  | 744           | 744                 | 3   | 879           | 860                 | 49  | 793           | 776                 | 37  | 861           | 842                 | 6   |
| 767           | 750                 | 45  | 703           | 703                 | 3   | 809           | 792                 | 3   | 725           | 725                 | 49  | 782           | 765                 | 6   |
| 738           | 738                 | 9   | 653           | 653                 | 22  | 735           | 735                 | 2   | 701           | 701                 | 1   | 650           | 650                 | 122 |
| 679           | 679                 | 14  | 600           | 600                 | 1   | 674           | 674                 | 4   | 659           | 659                 | 3   | 647           | 647                 | 0   |
| 623           | 623                 | 36  | 576           | 576                 | 7   | 637           | 637                 | 3   | 536           | 536                 | 145 | 624           | 624                 | 7   |
| 549           | 549                 | 4   | 484           | 484                 | 5   | 531           | 531                 | 16  | 491           | 491                 | 6   | 532           | 532                 | 0   |
| 503           | 503                 | 4   | 413           | 413                 | 10  | 502           | 502                 | 1   | 432           | 432                 | 89  | 480           | 480                 | 8   |
| 425           | 425                 | 8   | 388           | 388                 | 60  | 414           | 414                 | 3   | 411           | 411                 | 9   | 388           | 388                 | 2   |
| 408           | 408                 | 4   | 363           | 363                 | 105 | 365           | 365                 | 5   | 394           | 394                 | 0   | 370           | 370                 | 14  |
| 322           | 322                 | 11  | 309           | 309                 | 7   | 343           | 343                 | 5   | 311           | 311                 | 4   | 335           | 335                 | 3   |
| 199           | 199                 | 5   | 230           | 230                 | 12  | 327           | 327                 | 178 | 217           | 217                 | 19  | 201           | 201                 | 111 |
| 180           | 180                 | 1   | 171           | 171                 | 1   | 190           | 190                 | 8   | 163           | 163                 | 1   | 164           | 164                 | 8   |
| 156           | 156                 | 1   | 127           | 127                 | 3   | 124           | 124                 | 5   | 133           | 133                 | 5   | 100           | 100                 | 3   |
| 71            | 71                  | 1   | 37            | 37                  | 5   | 74            | 74                  | 3   | 64            | 64                  | 2   | 61            | 61                  | 18  |
| AMTfp12       |                     |     | AMTfp13       |                     |     | AMTfp14       |                     |     | AMTfp22       |                     |     | AMTfp26       |                     |     |
| $\tilde{v}_h$ | $\tilde{v}_{scal.}$ | $I$ |
| 3306          | 3187                | 17  | 3082          | 2971                | 6   | 3141          | 3028                | 5   | 3473          | 3348                | 64  | 3198          | 3083                | 1   |
| 3102          | 2990                | 6   | 3077          | 2966                | 8   | 3117          | 3004                | 12  | 3087          | 2976                | 6   | 3198          | 3083                | 1   |
| 3081          | 2970                | 5   | 3023          | 2914                | 31  | 3071          | 2961                | 15  | 3087          | 2976                | 6   | 3127          | 3014                | 0   |
| 3024          | 2915                | 17  | 2637          | 2542                | 3   | 3024          | 2915                | 40  | 3028          | 2919                | 17  | 3123          | 3010                | 2   |
| 1890          | 1848                | 11  | 2289          | 2238                | 0   | 1836          | 1796                | 333 | 2222          | 2173                | 10  | 2041          | 1996                | 92  |
| 1477          | 1444                | 10  | 1482          | 1449                | 9   | 1494          | 1461                | 5   | 1479          | 1446                | 9   | 1486          | 1453                | 0   |
| 1464          | 1432                | 12  | 1474          | 1442                | 8   | 1484          | 1451                | 6   | 1479          | 1446                | 9   | 1429          | 1398                | 4   |
| 1407          | 1376                | 1   | 1417          | 1385                | 3   | 1409          | 1378                | 20  | 1417          | 1386                | 0   | 1110          | 1086                | 0   |
| 1058          | 1035                | 16  | 1081          | 1057                | 1   | 1281          | 1252                | 28  | 1058          | 1035                | 0   | 1021          | 998                 | 1   |
| 1053          | 1030                | 1   | 1056          | 1033                | 0   | 1082          | 1058                | 0   | 1058          | 1035                | 0   | 1021          | 998                 | 1   |
| 959           | 938                 | 13  | 1051          | 1028                | 2   | 1049          | 1026                | 1   | 941           | 920                 | 0   | 884           | 864                 | 0   |
| 897           | 877                 | 14  | 975           | 953                 | 14  | 1011          | 989                 | 25  | 666           | 666                 | 48  | 876           | 857                 | 55  |
| 668           | 668                 | 30  | 570           | 570                 | 0   | 781           | 764                 | 1   | 666           | 666                 | 48  | 876           | 857                 | 55  |
| 645           | 645                 | 9   | 397           | 397                 | 0   | 630           | 630                 | 28  | 346           | 346                 | 10  | 373           | 373                 | 8   |
| 436           | 436                 | 3   | 396           | 396                 | 0   | 556           | 556                 | 8   | 346           | 346                 | 10  | 373           | 373                 | 8   |
| 297           | 297                 | 9   | 183           | 183                 | 11  | 393           | 393                 | 9   |               |                     |     |               |                     |     |
| 260           | 260                 | 1   | 173           | 173                 | 7   | 177           | 177                 | 0   |               |                     |     |               |                     |     |
| 188           | 188                 | 0   | 27            | 27                  | 10  | 142           | 142                 | 0   |               |                     |     |               |                     |     |
| AMTfp11       |                     |     | AMTfp23       |                     |     | AMTfp24       |                     |     | AMTfp25       |                     |     | AMTfp27       |                     |     |
| $\tilde{v}_h$ | $\tilde{v}_{scal.}$ | $I$ |
| 3637          | 3506                | 66  | 3706          | 3573                | 68  | 3528          | 3401                | 30  | 3557          | 3429                | 66  | 3739          | 3605                | 69  |
| 3547          | 3419                | 40  | 3578          | 3449                | 58  | 3443          | 3319                | 29  | 2673          | 2576                | 0   | 3733          | 3599                | 333 |

| 2351          | 2299                | 117 | 1831          | 1791                | 224 | 1839          | 1798                | 332 | 2212          | 2164                | 900 | 2236          | 2186                | 883 |
|---------------|---------------------|-----|---------------|---------------------|-----|---------------|---------------------|-----|---------------|---------------------|-----|---------------|---------------------|-----|
| 1630          | 1594                | 40  | 1620          | 1585                | 47  | 1169          | 1143                | 259 | 1356          | 1326                | 0   | 1318          | 1289                | 0   |
| 1192          | 1166                | 0   | 1245          | 1217                | 86  | 1117          | 1093                | 20  | 1028          | 1005                | 16  | 861           | 842                 | 62  |
| 1095          | 1071                | 10  | 1090          | 1066                | 5   | 1050          | 1027                | 37  | 945           | 924                 | 269 | 695           | 695                 | 0   |
| 563           | 563                 | 142 | 682           | 682                 | 14  | 917           | 897                 | 76  | 678           | 678                 | 20  | 614           | 614                 | 5   |
| 489           | 489                 | 82  | 561           | 561                 | 6   | 801           | 783                 | 69  | 603           | 603                 | 59  | 553           | 553                 | 15  |
| 412           | 412                 | 0   | 513           | 513                 | 11  | 623           | 623                 | 66  | 589           | 589                 | 23  | 527           | 527                 | 595 |
|               |                     |     | 393           | 393                 | 8   | 600           | 600                 | 4   | 465           | 465                 | 44  |               |                     |     |
|               |                     |     | 327           | 327                 | 5   | 471           | 471                 | 6   | 196           | 196                 | 18  |               |                     |     |
|               |                     |     | 243           | 243                 | 211 | 393           | 393                 | 14  | 176           | 176                 | 5   |               |                     |     |
| AMTfp21       |                     |     | AMTfp28       |                     |     | AMTfp29       |                     |     | AMTfp30       |                     |     | AMTfp31       |                     |     |
| $\tilde{v}_h$ | $\tilde{v}_{scal.}$ | $l$ |
| 3623          | 3493                | 23  | 3477          | 3352                | 8   | 3475          | 3350                | 2   | 3124          | 3011                | 8   | 3223          | 3107                | 4   |
| 3529          | 3402                | 25  | 3450          | 3326                | 2   | 3467          | 3342                | 4   | 3095          | 2983                | 4   | 3104          | 2993                | 11  |
| 3291          | 3173                | 6   | 3234          | 3118                | 3   | 3141          | 3028                | 7   | 3071          | 2961                | 12  | 3076          | 2965                | 3   |
| 3149          | 3035                | 5   | 3105          | 2993                | 11  | 3129          | 3016                | 5   | 3058          | 2948                | 7   | 3073          | 2963                | 17  |
| 3095          | 2983                | 36  | 3059          | 2949                | 11  | 3086          | 2975                | 8   | 3048          | 2938                | 22  | 3069          | 2959                | 9   |
| 3029          | 2920                | 77  | 3013          | 2905                | 28  | 3022          | 2913                | 27  | 3021          | 2912                | 28  | 3020          | 2912                | 23  |
| 1818          | 1778                | 65  | 1676          | 1639                | 2   | 1830          | 1790                | 385 | 1827          | 1787                | 433 | 1684          | 1647                | 0   |
| 1643          | 1607                | 74  | 1488          | 1455                | 16  | 1497          | 1464                | 9   | 1676          | 1639                | 30  | 1669          | 1633                | 34  |
| 1520          | 1486                | 15  | 1474          | 1442                | 9   | 1483          | 1450                | 11  | 1492          | 1459                | 4   | 1487          | 1454                | 14  |
| 1451          | 1419                | 80  | 1423          | 1392                | 18  | 1443          | 1411                | 28  | 1485          | 1452                | 13  | 1478          | 1445                | 71  |
| 1277          | 1249                | 104 | 1414          | 1383                | 1   | 1402          | 1371                | 6   | 1470          | 1438                | 67  | 1473          | 1440                | 9   |
| 1262          | 1234                | 16  | 1334          | 1305                | 8   | 1379          | 1349                | 5   | 1456          | 1424                | 40  | 1417          | 1386                | 1   |
| 1212          | 1185                | 3   | 1278          | 1250                | 35  | 1279          | 1250                | 38  | 1411          | 1380                | 13  | 1285          | 1256                | 8   |
| 1111          | 1087                | 6   | 1219          | 1192                | 14  | 1254          | 1227                | 3   | 1302          | 1273                | 13  | 1256          | 1228                | 1   |
| 1095          | 1071                | 12  | 1142          | 1117                | 24  | 1204          | 1177                | 55  | 1267          | 1239                | 35  | 1153          | 1128                | 9   |
| 1071          | 1047                | 37  | 1137          | 1112                | 90  | 1171          | 1145                | 41  | 1173          | 1148                | 18  | 1108          | 1084                | 9   |
| 1041          | 1018                | 34  | 1121          | 1096                | 46  | 1135          | 1110                | 105 | 1161          | 1136                | 41  | 1065          | 1042                | 11  |
| 1009          | 987                 | 4   | 1059          | 1036                | 2   | 1091          | 1067                | 12  | 1048          | 1025                | 2   | 1013          | 990                 | 13  |
| 995           | 973                 | 30  | 997           | 975                 | 5   | 1073          | 1050                | 59  | 1020          | 998                 | 15  | 1004          | 982                 | 1   |
| 914           | 893                 | 4   | 900           | 880                 | 74  | 1042          | 1020                | 6   | 975           | 954                 | 10  | 977           | 955                 | 17  |
| 770           | 753                 | 10  | 837           | 819                 | 6   | 944           | 923                 | 1   | 821           | 803                 | 13  | 840           | 821                 | 39  |
| 744           | 744                 | 328 | 827           | 809                 | 5   | 844           | 826                 | 45  | 787           | 770                 | 26  | 810           | 792                 | 24  |
| 708           | 708                 | 35  | 778           | 761                 | 20  | 788           | 771                 | 0   | 766           | 749                 | 5   | 780           | 763                 | 10  |
| 615           | 615                 | 22  | 718           | 718                 | 6   | 697           | 697                 | 9   | 605           | 605                 | 7   | 714           | 714                 | 18  |
| 514           | 514                 | 57  | 598           | 598                 | 0   | 576           | 576                 | 8   | 566           | 566                 | 2   | 561           | 561                 | 5   |
| 476           | 476                 | 5   | 567           | 567                 | 4   | 548           | 548                 | 3   | 485           | 485                 | 5   | 540           | 540                 | 10  |
| 446           | 446                 | 3   | 523           | 523                 | 0   | 407           | 407                 | 1   | 335           | 335                 | 8   | 472           | 472                 | 13  |
| 420           | 420                 | 16  | 353           | 353                 | 1   | 381           | 381                 | 3   | 317           | 317                 | 4   | 335           | 335                 | 11  |
| 340           | 340                 | 43  | 320           | 320                 | 3   | 249           | 249                 | 3   | 185           | 185                 | 9   | 266           | 266                 | 1   |
| 264           | 264                 | 32  | 228           | 228                 | 1   | 210           | 210                 | 3   | 158           | 158                 | 3   | 235           | 235                 | 7   |
| 164           | 164                 | 6   | 211           | 211                 | 0   | 128           | 128                 | 0   | 149           | 149                 | 1   | 186           | 186                 | 3   |
| 125           | 125                 | 4   | 186           | 186                 | 1   | 124           | 124                 | 1   | 130           | 130                 | 3   | 144           | 144                 | 1   |
| 94            | 94                  | 0   | 138           | 138                 | 0   | 62            | 62                  | 1   | 53            | 53                  | 2   | 110           | 110                 | 2   |
| AMTfp32       |                     |     | AMTfp33       |                     |     | AMTfp34       |                     |     | AMTfp35       |                     |     | AMTfp36       |                     |     |
| $\tilde{v}_h$ | $\tilde{v}_{scal.}$ | $l$ |
| 3289          | 3171                | 3   | 3378          | 3256                | 3   | 3670          | 3538                | 27  | 3672          | 3540                | 34  | 3705          | 3572                | 59  |
| 3245          | 3128                | 3   | 3177          | 3063                | 2   | 3562          | 3434                | 34  | 3561          | 3432                | 40  | 3580          | 3451                | 93  |
| 3156          | 3042                | 4   | 3157          | 3044                | 4   | 3487          | 3361                | 7   | 3517          | 3390                | 26  | 3171          | 3057                | 6   |
| 3120          | 3008                | 14  | 3101          | 2989                | 16  | 3180          | 3066                | 2   | 3084          | 2973                | 4   | 3118          | 3006                | 4   |
| 3098          | 2987                | 6   | 3065          | 2955                | 11  | 3147          | 3034                | 63  | 3082          | 2971                | 7   | 3056          | 2946                | 19  |
| 3043          | 2934                | 9   | 3020          | 2911                | 25  | 3110          | 2998                | 8   | 3024          | 2915                | 25  | 3016          | 2907                | 44  |
| 1657          | 1620                | 14  | 1765          | 1726                | 99  | 2037          | 1992                | 20  | 2278          | 2228                | 2   | 1751          | 1713                | 2   |
| 1649          | 1613                | 3   | 1677          | 1640                | 1   | 1685          | 1648                | 268 | 1719          | 1681                | 208 | 1652          | 1616                | 461 |
| 1494          | 1461                | 28  | 1487          | 1455                | 13  | 1639          | 1603                | 105 | 1624          | 1588                | 71  | 1593          | 1558                | 104 |
| 1471          | 1439                | 9   | 1477          | 1445                | 7   | 1473          | 1441                | 3   | 1480          | 1447                | 9   | 1487          | 1454                | 6   |
| 1463          | 1431                | 80  | 1416          | 1384                | 0   | 1336          | 1307                | 182 | 1473          | 1440                | 9   | 1486          | 1453                | 6   |

| 1443          | 1412                | 17  | 1351          | 1322                | 10  | 1263          | 1235                | 41  | 1416          | 1385                | 2   | 1412          | 1381                | 0   |
|---------------|---------------------|-----|---------------|---------------------|-----|---------------|---------------------|-----|---------------|---------------------|-----|---------------|---------------------|-----|
| 1416          | 1385                | 10  | 1345          | 1316                | 2   | 1114          | 1089                | 9   | 1313          | 1284                | 290 | 1354          | 1324                | 204 |
| 1326          | 1297                | 31  | 1292          | 1263                | 18  | 1097          | 1073                | 15  | 1137          | 1112                | 72  | 1332          | 1303                | 24  |
| 1202          | 1176                | 149 | 1122          | 1097                | 41  | 1060          | 1037                | 122 | 1090          | 1066                | 42  | 1129          | 1105                | 3   |
| 1089          | 1065                | 25  | 1106          | 1082                | 26  | 1025          | 1002                | 1   | 1080          | 1056                | 7   | 1099          | 1075                | 5   |
| 1073          | 1050                | 1   | 1068          | 1045                | 1   | 899           | 879                 | 46  | 1056          | 1032                | 1   | 1059          | 1036                | 1   |
| 1010          | 988                 | 13  | 1021          | 999                 | 33  | 894           | 875                 | 17  | 1048          | 1025                | 2   | 1013          | 990                 | 48  |
| 975           | 954                 | 29  | 975           | 953                 | 37  | 780           | 763                 | 30  | 803           | 785                 | 37  | 972           | 951                 | 36  |
| 955           | 934                 | 6   | 966           | 945                 | 16  | 771           | 754                 | 69  | 639           | 639                 | 52  | 814           | 796                 | 19  |
| 900           | 880                 | 5   | 770           | 753                 | 3   | 662           | 662                 | 87  | 624           | 624                 | 30  | 724           | 724                 | 4   |
| 786           | 769                 | 5   | 770           | 753                 | 9   | 598           | 598                 | 4   | 597           | 597                 | 19  | 668           | 668                 | 9   |
| 653           | 653                 | 6   | 667           | 667                 | 14  | 552           | 552                 | 3   | 498           | 498                 | 146 | 648           | 648                 | 2   |
| 620           | 620                 | 3   | 552           | 552                 | 6   | 520           | 520                 | 7   | 492           | 492                 | 61  | 588           | 588                 | 1   |
| 464           | 464                 | 0   | 452           | 452                 | 1   | 479           | 479                 | 10  | 413           | 413                 | 5   | 549           | 549                 | 7   |
| 442           | 442                 | 4   | 418           | 418                 | 11  | 431           | 431                 | 229 | 398           | 398                 | 6   | 394           | 394                 | 70  |
| 406           | 406                 | 5   | 341           | 341                 | 2   | 370           | 370                 | 11  | 356           | 356                 | 5   | 387           | 387                 | 17  |
| 353           | 353                 | 4   | 267           | 267                 | 5   | 329           | 329                 | 13  | 346           | 346                 | 25  | 351           | 351                 | 21  |
| 254           | 254                 | 4   | 250           | 250                 | 2   | 304           | 304                 | 8   | 257           | 257                 | 5   | 309           | 309                 | 183 |
| 235           | 235                 | 2   | 194           | 194                 | 1   | 248           | 248                 | 5   | 187           | 187                 | 7   | 237           | 237                 | 1   |
| 174           | 174                 | 0   | 118           | 118                 | 3   | 116           | 116                 | 5   | 80            | 80                  | 3   | 169           | 169                 | 2   |
| 85            | 85                  | 0   | 96            | 96                  | 4   | 73            | 73                  | 5   | 60            | 60                  | 3   | 165           | 165                 | 2   |
| 40            | 40                  | 0   | 72            | 72                  | 1   | 35            | 35                  | 5   | 20            | 20                  | 0   | 129           | 129                 | 10  |
| AMTfp37       |                     |     | AMTfp38       |                     |     | AMTfp39       |                     |     | AMTfp40       |                     |     | AMTfp41       |                     |     |
| $\tilde{v}_h$ | $\tilde{v}_{scal.}$ | $l$ |
| 3719          | 3585                | 62  | 3688          | 3556                | 46  | 3524          | 3398                | 18  | 3664          | 3533                | 29  | 3706          | 3573                | 33  |
| 3579          | 3450                | 73  | 3569          | 3441                | 54  | 3464          | 3340                | 27  | 3552          | 3424                | 28  | 3594          | 3464                | 30  |
| 3155          | 3042                | 4   | 3222          | 3106                | 9   | 3252          | 3135                | 1   | 3200          | 3085                | 6   | 3155          | 3042                | 10  |
| 3114          | 3002                | 13  | 3161          | 3047                | 2   | 3192          | 3077                | 2   | 3164          | 3050                | 5   | 3122          | 3009                | 30  |
| 3076          | 2965                | 13  | 3135          | 3023                | 8   | 3154          | 3041                | 7   | 3079          | 2968                | 30  | 2977          | 2870                | 28  |
| 3027          | 2918                | 39  | 3089          | 2977                | 12  | 3091          | 2980                | 4   | 2956          | 2850                | 46  | 2947          | 2841                | 31  |
| 2114          | 2068                | 615 | 1693          | 1656                | 55  | 1673          | 1636                | 334 | 1717          | 1679                | 262 | 1835          | 1795                | 356 |
| 1621          | 1586                | 230 | 1673          | 1636                | 307 | 1646          | 1610                | 23  | 1658          | 1622                | 3   | 1720          | 1682                | 511 |
| 1509          | 1476                | 9   | 1614          | 1579                | 20  | 1605          | 1570                | 46  | 1618          | 1583                | 56  | 1641          | 1605                | 38  |
| 1484          | 1451                | 6   | 1459          | 1427                | 17  | 1440          | 1409                | 66  | 1488          | 1455                | 3   | 1472          | 1440                | 6   |
| 1437          | 1405                | 113 | 1344          | 1315                | 138 | 1378          | 1348                | 13  | 1377          | 1347                | 13  | 1423          | 1392                | 6   |
| 1416          | 1385                | 15  | 1323          | 1294                | 33  | 1326          | 1297                | 1   | 1346          | 1316                | 5   | 1377          | 1347                | 61  |
| 1382          | 1352                | 259 | 1296          | 1267                | 37  | 1244          | 1217                | 32  | 1276          | 1248                | 109 | 1280          | 1252                | 81  |
| 1284          | 1256                | 185 | 1179          | 1154                | 2   | 1220          | 1193                | 1   | 1252          | 1224                | 39  | 1244          | 1216                | 98  |
| 1190          | 1163                | 1   | 1142          | 1117                | 18  | 1184          | 1158                | 195 | 1207          | 1180                | 2   | 1203          | 1177                | 4   |
| 1088          | 1064                | 4   | 1098          | 1073                | 4   | 1144          | 1119                | 43  | 1171          | 1145                | 4   | 1097          | 1073                | 10  |
| 1058          | 1035                | 1   | 1033          | 1010                | 51  | 1037          | 1014                | 11  | 1023          | 1000                | 12  | 1062          | 1038                | 9   |
| 964           | 943                 | 46  | 1025          | 1003                | 5   | 1023          | 1000                | 36  | 995           | 973                 | 39  | 1000          | 978                 | 5   |
| 887           | 868                 | 44  | 964           | 943                 | 39  | 1006          | 983                 | 33  | 957           | 936                 | 6   | 966           | 945                 | 25  |
| 741           | 741                 | 6   | 930           | 910                 | 19  | 947           | 926                 | 0   | 906           | 886                 | 23  | 943           | 923                 | 13  |
| 719           | 719                 | 15  | 769           | 753                 | 28  | 890           | 871                 | 132 | 818           | 800                 | 21  | 848           | 830                 | 35  |
| 665           | 665                 | 15  | 713           | 713                 | 7   | 783           | 766                 | 23  | 720           | 720                 | 11  | 670           | 670                 | 9   |
| 596           | 596                 | 7   | 681           | 681                 | 10  | 759           | 742                 | 4   | 665           | 665                 | 34  | 649           | 649                 | 16  |
| 587           | 587                 | 1   | 627           | 627                 | 17  | 599           | 599                 | 71  | 644           | 644                 | 85  | 569           | 569                 | 11  |
| 531           | 531                 | 7   | 477           | 477                 | 47  | 556           | 556                 | 5   | 607           | 607                 | 23  | 537           | 537                 | 10  |
| 446           | 446                 | 2   | 455           | 455                 | 95  | 514           | 514                 | 1   | 547           | 547                 | 111 | 397           | 397                 | 12  |
| 394           | 394                 | 3   | 427           | 427                 | 84  | 492           | 492                 | 5   | 506           | 506                 | 32  | 274           | 274                 | 33  |
| 326           | 326                 | 169 | 363           | 363                 | 8   | 411           | 411                 | 8   | 438           | 438                 | 10  | 330           | 330                 | 70  |
| 229           | 229                 | 2   | 354           | 354                 | 23  | 274           | 274                 | 1   | 410           | 410                 | 18  | 324           | 324                 | 138 |
| 180           | 180                 | 1   | 321           | 321                 | 34  | 193           | 193                 | 1   | 390           | 390                 | 19  | 227           | 227                 | 3   |
| 134           | 134                 | 0   | 261           | 261                 | 8   | 169           | 169                 | 0   | 354           | 354                 | 9   | 133           | 133                 | 1   |
| 102           | 102                 | 3   | 116           | 116                 | 5   | 160           | 160                 | 0   | 235           | 235                 | 12  | 57            | 57                  | 5   |
| 33            | 33                  | 5   | 104           | 104                 | 1   | 130           | 130                 | 0   | 95            | 95                  | 1   | 42            | 42                  | 2   |

| Compfp11-12a  |                     |     | Compfp11-12b  |                     |     | Compfp11-13a  |                     |     | Compfp11-13b  |                     |     | Compfp11-14   |                     |     |
|---------------|---------------------|-----|---------------|---------------------|-----|---------------|---------------------|-----|---------------|---------------------|-----|---------------|---------------------|-----|
| $\check{V}_h$ | $\check{V}_{scal.}$ | I   |
| 3598          | 3469                | 89  | 3597          | 3467                | 90  | 3615          | 3485                | 118 | 3607          | 3477                | 109 | 3610          | 3480                | 124 |
| 3308          | 3189                | 21  | 3310          | 3191                | 42  | 3493          | 3367                | 205 | 3471          | 3346                | 170 | 3453          | 3329                | 257 |
| 3279          | 3148                | 735 | 3294          | 3175                | 694 | 3094          | 2983                | 0   | 3083          | 2972                | 6   | 3139          | 3026                | 5   |
| 3104          | 2993                | 3   | 3107          | 2995                | 3   | 3087          | 2976                | 4   | 3080          | 2969                | 6   | 3122          | 3010                | 12  |
| 3088          | 2977                | 2   | 3087          | 2976                | 3   | 3029          | 2920                | 13  | 3024          | 2915                | 24  | 3090          | 2979                | 8   |
| 3024          | 2915                | 11  | 3028          | 2919                | 11  | 2639          | 2544                | 1   | 2616          | 2521                | 25  | 3032          | 2923                | 20  |
| 2335          | 2281                | 142 | 2333          | 2284                | 140 | 2343          | 2292                | 122 | 2341          | 2290                | 108 | 2342          | 2290                | 112 |
| 1891          | 1849                | 9   | 1895          | 1854                | 6   | 2279          | 2229                | 2   | 2276          | 2226                | 2   | 1837          | 1796                | 247 |
| 1632          | 1596                | 24  | 1637          | 1601                | 21  | 1621          | 1585                | 17  | 1622          | 1586                | 26  | 1634          | 1598                | 22  |
| 1477          | 1445                | 9   | 1476          | 1443                | 10  | 1481          | 1448                | 8   | 1482          | 1449                | 9   | 1489          | 1456                | 7   |
| 1464          | 1432                | 9   | 1463          | 1431                | 12  | 1474          | 1441                | 8   | 1475          | 1442                | 8   | 1485          | 1452                | 8   |
| 1413          | 1382                | 2   | 1408          | 1377                | 2   | 1420          | 1389                | 1   | 1418          | 1387                | 2   | 1409          | 1378                | 13  |
| 1227          | 1200                | 5   | 1225          | 1198                | 3   | 1204          | 1177                | 2   | 1216          | 1189                | 4   | 1273          | 1245                | 19  |
| 1106          | 1082                | 9   | 1103          | 1078                | 10  | 1100          | 1076                | 10  | 1100          | 1076                | 9   | 1205          | 1178                | 2   |
| 1060          | 1037                | 3   | 1056          | 1032                | 8   | 1075          | 1051                | 2   | 1076          | 1052                | 2   | 1103          | 1078                | 8   |
| 1055          | 1032                | 14  | 1054          | 1031                | 9   | 1059          | 1036                | 1   | 1056          | 1033                | 1   | 1080          | 1056                | 0   |
| 963           | 942                 | 12  | 965           | 944                 | 9   | 1053          | 1029                | 1   | 1052          | 1029                | 2   | 1052          | 1029                | 0   |
| 898           | 878                 | 16  | 901           | 881                 | 15  | 973           | 952                 | 14  | 990           | 968                 | 8   | 1005          | 983                 | 24  |
| 695           | 695                 | 124 | 686           | 686                 | 39  | 608           | 608                 | 139 | 635           | 635                 | 133 | 776           | 759                 | 2   |
| 676           | 676                 | 28  | 672           | 682                 | 117 | 569           | 569                 | 0   | 569           | 569                 | 0   | 656           | 656                 | 32  |
| 642           | 642                 | 9   | 636           | 636                 | 10  | 515           | 515                 | 16  | 517           | 517                 | 14  | 594           | 594                 | 138 |
| 532           | 532                 | 3   | 531           | 531                 | 3   | 420           | 420                 | 1   | 422           | 422                 | 0   | 555           | 555                 | 8   |
| 440           | 440                 | 3   | 444           | 444                 | 5   | 401           | 401                 | 0   | 405           | 405                 | 1   | 521           | 521                 | 14  |
| 436           | 436                 | 6   | 438           | 438                 | 2   | 399           | 399                 | 0   | 397           | 397                 | 1   | 429           | 429                 | 1   |
| 320           | 320                 | 5   | 315           | 315                 | 36  | 219           | 219                 | 11  | 244           | 244                 | 37  | 391           | 391                 | 7   |
| 298           | 298                 | 63  | 294           | 294                 | 31  | 202           | 202                 | 36  | 223           | 223                 | 30  | 226           | 226                 | 40  |
| 265           | 265                 | 1   | 261           | 261                 | 3   | 170           | 170                 | 9   | 191           | 191                 | 14  | 175           | 175                 | 0   |
| 198           | 198                 | 4   | 181           | 181                 | 5   | 140           | 140                 | 13  | 181           | 181                 | 4   | 148           | 148                 | 0   |
| 153           | 153                 | 33  | 148           | 148                 | 28  | 91            | 91                  | 7   | 96            | 96                  | 11  | 111           | 111                 | 23  |
| 87            | 87                  | 2   | 86            | 86                  | 0   | 52            | 52                  | 2   | 55            | 55                  | 9   | 75            | 75                  | 0   |
| 71            | 71                  | 7   | 40            | 40                  | 11  | 43            | 43                  | 7   | 47            | 47                  | 11  | 61            | 61                  | 8   |
| 53            | 53                  | 6   | 38            | 38                  | 11  | 21            | 21                  | 11  | 40            | 40                  | 7   | 50            | 50                  | 1   |
| 39            | 39                  | 12  | 22            | 22                  | 4   | 16            | 16                  | 10  | 33            | 33                  | 1   | 31            | 31                  | 13  |
| Compfp22-23a  |                     |     | Compfp22-23b  |                     |     | Compfp22-24   |                     |     | Compfp22-25a  |                     |     | Compfp22-25b  |                     |     |
| $\check{V}_h$ | $\check{V}_{scal.}$ | I   |
| 3647          | 3516                | 141 | 3695          | 3562                | 122 | 3529          | 3402                | 31  | 3466          | 3342                | 86  | 3555          | 3427                | 66  |
| 3506          | 3380                | 296 | 3482          | 3356                | 337 | 3450          | 3326                | 130 | 3464          | 3340                | 512 | 3468          | 3343                | 67  |
| 3463          | 3338                | 71  | 3464          | 3339                | 67  | 3444          | 3320                | 45  | 3095          | 2984                | 3   | 3095          | 2983                | 1   |
| 3095          | 2984                | 3   | 3095          | 2983                | 3   | 3087          | 2975                | 6   | 3094          | 2983                | 4   | 3091          | 2980                | 4   |
| 3089          | 2977                | 1   | 3088          | 2977                | 3   | 3086          | 2975                | 6   | 3033          | 2923                | 11  | 3031          | 2922                | 11  |
| 3028          | 2919                | 10  | 3027          | 2918                | 13  | 3028          | 2919                | 20  | 2678          | 2582                | 0   | 2641          | 2546                | 82  |
| 2211          | 2162                | 12  | 2208          | 2159                | 17  | 2219          | 2170                | 5   | 2215          | 2167                | 140 | 2216          | 2167                | 20  |
| 1831          | 1791                | 234 | 1827          | 1786                | 215 | 1842          | 1802                | 316 | 2211          | 2163                | 917 | 2208          | 2160                | 964 |
| 1630          | 1595                | 25  | 1626          | 1590                | 19  | 1479          | 1447                | 9   | 1479          | 1446                | 8   | 1481          | 1448                | 7   |
| 1480          | 1447                | 6   | 1478          | 1446                | 5   | 1479          | 1446                | 9   | 1478          | 1445                | 7   | 1478          | 1446                | 5   |
| 1477          | 1444                | 7   | 1478          | 1445                | 7   | 1417          | 1386                | 0   | 1419          | 1387                | 1   | 1419          | 1388                | 1   |
| 1420          | 1389                | 1   | 1424          | 1393                | 2   | 1165          | 1140                | 258 | 1357          | 1327                | 2   | 1354          | 1324                | 0   |
| 1246          | 1219                | 61  | 1260          | 1232                | 111 | 1117          | 1092                | 26  | 1062          | 1039                | 1   | 1063          | 1039                | 2   |
| 1106          | 1082                | 10  | 1099          | 1075                | 4   | 1058          | 1035                | 0   | 1059          | 1035                | 0   | 1059          | 1036                | 0   |
| 1063          | 1039                | 1   | 1064          | 1041                | 1   | 1057          | 1034                | 0   | 1027          | 1004                | 22  | 1054          | 1031                | 8   |
| 1058          | 1035                | 0   | 1059          | 1036                | 0   | 1051          | 1027                | 39  | 976           | 954                 | 358 | 949           | 929                 | 278 |
| 936           | 915                 | 0   | 935           | 915                 | 0   | 941           | 920                 | 0   | 938           | 917                 | 8   | 938           | 917                 | 1   |
| 681           | 681                 | 13  | 689           | 689                 | 5   | 917           | 897                 | 76  | 688           | 688                 | 21  | 680           | 680                 | 31  |
| 676           | 676                 | 66  | 668           | 668                 | 76  | 802           | 785                 | 71  | 675           | 675                 | 69  | 668           | 668                 | 59  |

|     |     |     |     |     |     |     |     |    |     |     |    |     |     |    |
|-----|-----|-----|-----|-----|-----|-----|-----|----|-----|-----|----|-----|-----|----|
| 659 | 659 | 45  | 653 | 653 | 59  | 695 | 695 | 34 | 668 | 668 | 99 | 660 | 660 | 47 |
| 593 | 593 | 4   | 597 | 597 | 4   | 694 | 694 | 52 | 654 | 654 | 3  | 602 | 602 | 61 |
| 517 | 517 | 11  | 523 | 523 | 11  | 619 | 619 | 66 | 594 | 594 | 6  | 588 | 588 | 18 |
| 469 | 469 | 37  | 490 | 490 | 8   | 600 | 600 | 6  | 508 | 508 | 23 | 465 | 465 | 43 |
| 377 | 377 | 120 | 368 | 368 | 16  | 472 | 472 | 7  | 360 | 360 | 15 | 354 | 354 | 15 |
| 363 | 363 | 15  | 353 | 353 | 11  | 392 | 392 | 15 | 349 | 349 | 8  | 349 | 349 | 10 |
| 352 | 352 | 8   | 338 | 338 | 5   | 348 | 348 | 9  | 195 | 195 | 16 | 288 | 288 | 8  |
| 335 | 335 | 11  | 230 | 230 | 132 | 348 | 348 | 7  | 184 | 184 | 5  | 182 | 182 | 11 |
| 106 | 106 | 8   | 101 | 101 | 9   | 52  | 52  | 1  | 105 | 105 | 4  | 66  | 66  | 4  |
| 77  | 77  | 0   | 88  | 88  | 0   | 39  | 39  | 0  | 74  | 74  | 2  | 63  | 63  | 2  |
| 76  | 76  | 0   | 77  | 77  | 0   | 35  | 35  | 0  | 58  | 58  | 0  | 60  | 60  | 1  |
| 47  | 47  | 2   | 59  | 59  | 6   | 23  | 23  | 0  | 53  | 53  | 1  | 45  | 45  | 5  |
| 41  | 41  | 3   | 35  | 35  | 4   | 18  | 18  | 3  | 26  | 26  | 2  | 31  | 31  | 0  |
| 23  | 23  | 1   | 17  | 17  | 9   | 10  | 10  | 1  | 12  | 12  | 1  | 14  | 14  | 1  |

<sup>a</sup>The following scaling factors were used: 1.0 (below 750 cm<sup>-1</sup>), 0.978 (in the range 750 - 2500 cm<sup>-1</sup>), 0.964 (above 2500 cm<sup>-1</sup>)

**Table S3.** Anharmonic and harmonic wavenumbers (in cm<sup>-1</sup>) calculated for the fp1, fp2, fp3, fp15, fp25, fp23 molecules at the B3LYP/6-311++G(3df,3pd) level of theory. The IR calculated intensities expressed in km mol<sup>-1</sup>.

### fp1s

| Mode(Quanta) | E(harm)  | E(anharm) | I(harm)       | I(anharm)     |
|--------------|----------|-----------|---------------|---------------|
| 1(1)         | 3579.037 | 3392.804  | 78.87965004   | 60.89664633   |
| 2(1)         | 3217.960 | 3089.359  | 4.57881029    | 4.32176559    |
| 3(1)         | 3117.260 | 2978.750  | 13.74120208   | 12.65420903   |
| 4(1)         | 3062.612 | 2918.393  | 13.85564414   | 15.90955940   |
| 5(1)         | 3017.155 | 2931.480  | 29.45786749   | 32.35640097   |
| 6(1)         | 2693.651 | 2457.346  | 0.76080442    | 1.27506352    |
| 7(1)         | 2220.583 | 2182.067  | 1332.16112647 | 1179.75039275 |
| 8(1)         | 1672.529 | 1623.091  | 30.08139650   | 19.41823772   |
| 9(1)         | 1487.714 | 1451.866  | 7.93513538    | 6.58501319    |
| 10(1)        | 1477.131 | 1443.350  | 7.99217670    | 4.04266935    |
| 11(1)        | 1430.125 | 1403.450  | 9.77005549    | 9.19818070    |
| 12(1)        | 1417.917 | 1386.302  | 0.96432053    | 0.98974434    |
| 13(1)        | 1291.281 | 1270.711  | 24.43506090   | 19.17591972   |
| 14(1)        | 1153.525 | 1126.196  | 18.68860530   | 16.60794085   |
| 15(1)        | 1065.250 | 1043.510  | 0.95161737    | 1.19399670    |
| 16(1)        | 1050.755 | 1035.206  | 20.54866945   | 4.75382240    |
| 17(1)        | 969.860  | 942.979   | 14.17423717   | 13.75467410   |
| 18(1)        | 911.963  | 863.714   | 406.28646750  | 306.05944352  |
| 19(1)        | 855.881  | 840.250   | 47.92019736   | 64.75408297   |
| 20(1)        | 805.822  | 799.249   | 18.85861358   | 16.80008083   |
| 21(1)        | 746.219  | 732.737   | 35.78032951   | 27.21522965   |
| 22(1)        | 630.715  | 621.447   | 15.13232213   | 9.67126845    |
| 23(1)        | 606.227  | 594.787   | 31.36184063   | 18.95645036   |
| 24(1)        | 512.737  | 507.958   | 26.31354417   | 31.62609754   |
| 25(1)        | 505.268  | 503.449   | 4.63374673    | 2.14317342    |
| 26(1)        | 421.497  | 398.940   | 71.89799027   | 70.09548601   |
| 27(1)        | 368.274  | 367.535   | 1.11067806    | 0.53044877    |
| 28(1)        | 250.723  | 196.609   | 6.20785954    | 32.42692743   |
| 29(1)        | 207.834  | 27.344    | 8.99416334    | 2.75601133    |
| 30(1)        | 188.493  | 185.678   | 4.89010505    | 3.98733226    |
| 31(1)        | 158.839  | 15.762    | 1.95660053    | 18.87152060   |
| 32(1)        | 98.089   | 97.908    | 0.95417152    | 0.79447876    |
| 33(1)        | 82.640   | 88.098    | 10.74112011   | 12.49386459   |



## fp1a

| Mode(Quanta) | E(harm)  | E(anharm) | I(harm)       | I(anharm)    |
|--------------|----------|-----------|---------------|--------------|
| 1(1)         | 3571.175 | 3409.900  | 68.91882044   | 55.53130826  |
| 2(1)         | 3202.701 | 3055.854  | 3.39888014    | 3.47034305   |
| 3(1)         | 3119.056 | 2987.162  | 7.81666071    | 6.11776138   |
| 4(1)         | 3071.863 | 2928.115  | 10.52305008   | 13.02554389  |
| 5(1)         | 3022.491 | 2927.888  | 15.51437393   | 18.62547306  |
| 6(1)         | 2685.679 | 2461.416  | 0.07168020    | 1.75894077   |
| 7(1)         | 2216.690 | 2171.390  | 1338.33162068 | 765.93869348 |
| 8(1)         | 1665.450 | 1617.228  | 18.50050867   | 21.31096734  |
| 9(1)         | 1486.110 | 1441.788  | 7.88978666    | 5.68464230   |
| 10(1)        | 1480.862 | 1437.902  | 2.81744542    | 3.49573430   |
| 11(1)        | 1423.529 | 1392.149  | 14.31575927   | 12.47440937  |
| 12(1)        | 1416.434 | 1386.359  | 2.66152837    | 85.42555816  |
| 13(1)        | 1312.259 | 1293.433  | 5.01457881    | 2.81188733   |
| 14(1)        | 1139.151 | 1114.747  | 42.82101323   | 23.12364169  |
| 15(1)        | 1062.105 | 1041.508  | 0.53638183    | 0.25094606   |
| 16(1)        | 1026.854 | 1008.942  | 17.73638306   | 7.20950022   |
| 17(1)        | 966.358  | 947.322   | 11.16516787   | 2.49928692   |
| 18(1)        | 922.103  | 868.490   | 443.49822167  | 346.43898915 |
| 19(1)        | 854.699  | 837.078   | 16.37561241   | 14.39907094  |
| 20(1)        | 846.977  | 825.064   | 41.74332414   | 36.44542576  |
| 21(1)        | 767.647  | 760.615   | 16.07906623   | 9.88254806   |
| 22(1)        | 649.137  | 640.843   | 23.76333207   | 18.30554449  |
| 23(1)        | 579.368  | 566.090   | 42.17498812   | 27.18958886  |
| 24(1)        | 489.023  | 488.953   | 34.53475529   | 33.79411489  |
| 25(1)        | 446.825  | 446.122   | 4.46131955    | 1.41176410   |
| 26(1)        | 423.138  | 413.704   | 49.90919040   | 57.81397598  |
| 27(1)        | 360.302  | 358.130   | 0.62578797    | 0.17871635   |
| 28(1)        | 265.855  | 248.392   | 9.43423989    | 9.98896651   |
| 29(1)        | 231.960  | 226.129   | 0.90686270    | 2.35992384   |
| 30(1)        | 154.044  | 94.553    | 16.42048729   | 192.52242781 |
| 31(1)        | 126.854  | -29.542 ! | 21.93289544   | 156.83659482 |
| 32(1)        | 111.728  | 112.136   | 2.12094702    | 95.62964612  |
| 33(1)        | 62.749   | 70.016    | 2.06589614    | 4.07193417   |

## fp2s

| Mode(Quanta) | E(harm)  | E(anharm) | I(harm)      | I(anharm)    |
|--------------|----------|-----------|--------------|--------------|
| 1(1)         | 3590.521 | 3419.136  | 82.35195876  | 63.48529681  |
| 2(1)         | 3126.096 | 2977.955  | 10.29119343  | 12.45939141  |
| 3(1)         | 3117.269 | 2970.232  | 17.99768099  | 19.36834067  |
| 4(1)         | 3077.372 | 2926.979  | 22.22694845  | 32.98311203  |
| 5(1)         | 3044.499 | 2950.857  | 15.02425749  | 15.62876147  |
| 6(1)         | 2956.827 | 2801.725  | 14.72071221  | 18.35622606  |
| 7(1)         | 2218.893 | 2176.756  | 948.81236385 | 472.54628291 |
| 8(1)         | 1500.878 | 1459.162  | 4.58777723   | 2.95105664   |
| 9(1)         | 1488.524 | 1442.741  | 7.65666555   | 6.32154927   |
| 10(1)        | 1417.855 | 1394.035  | 12.74750399  | 41.92306027  |
| 11(1)        | 1409.953 | 1373.536  | 18.04787850  | 5.22442588   |
| 12(1)        | 1363.136 | 1328.286  | 32.39336807  | 15.33517305  |
| 13(1)        | 1314.116 | 1281.003  | 26.21590158  | 20.04658902  |
| 14(1)        | 1279.472 | 1246.575  | 1.77926262   | 1.53911624   |
| 15(1)        | 1170.134 | 1142.141  | 14.33292018  | 15.48022434  |
| 16(1)        | 1104.742 | 1080.240  | 30.35152750  | 22.87819004  |
| 17(1)        | 1077.264 | 1058.153  | 29.80642123  | 15.77095544  |
| 18(1)        | 1012.247 | 991.179   | 26.57848304  | 16.07452875  |
| 19(1)        | 927.286  | 898.397   | 313.11763014 | 216.79645660 |
| 20(1)        | 892.223  | 874.121   | 2.79078529   | 44.20758197  |
| 21(1)        | 853.749  | 846.573   | 15.44261126  | 20.03719668  |
| 22(1)        | 758.815  | 743.566   | 18.80927355  | 5.99829168   |
| 23(1)        | 654.507  | 638.439   | 33.06349360  | 21.37802944  |
| 24(1)        | 614.615  | 599.716   | 14.52607536  | 13.93580682  |
| 25(1)        | 523.976  | 515.228   | 19.99220371  | 22.00600867  |
| 26(1)        | 451.983  | 438.002   | 53.17163958  | 32.65679573  |
| 27(1)        | 426.271  | 413.619   | 26.57626073  | 57.91663210  |

|       |         |         |            |            |
|-------|---------|---------|------------|------------|
| 28(1) | 336.136 | 333.967 | 1.62707963 | 1.56861879 |
| 29(1) | 250.123 | 236.725 | 4.56113589 | 7.13712376 |
| 30(1) | 233.594 | 220.919 | 2.04623067 | 0.90060526 |
| 31(1) | 128.512 | 125.250 | 6.65870366 | 6.10915931 |
| 32(1) | 97.903  | 97.219  | 0.86373588 | 0.71731891 |
| 33(1) | 62.456  | 57.913  | 6.72080629 | 6.77449826 |

## fp2a

| Mode(Quanta) | E(harm)  | E(anharm) | I(harm)       | I(anharm)    |
|--------------|----------|-----------|---------------|--------------|
| 1(1)         | 3583.641 | 3409.742  | 88.63692916   | 52.41525687  |
| 2(1)         | 3122.084 | 2975.963  | 13.42069588   | 13.23245038  |
| 3(1)         | 3115.507 | 2970.545  | 12.69287710   | 20.12717061  |
| 4(1)         | 3087.769 | 2945.213  | 12.60592068   | 15.61472068  |
| 5(1)         | 3058.263 | 2910.661  | 4.57519496    | 5.09127978   |
| 6(1)         | 3040.829 | 2944.779  | 12.52661027   | 13.94686836  |
| 7(1)         | 2220.656 | 2158.380  | 1184.79255543 | 805.59322463 |
| 8(1)         | 1496.059 | 1456.247  | 3.51945191    | 1.98044953   |
| 9(1)         | 1488.278 | 1451.043  | 7.23698826    | 5.64133978   |
| 10(1)        | 1414.266 | 1380.604  | 20.50805815   | 14.87065015  |
| 11(1)        | 1400.667 | 1368.816  | 13.51466185   | 14.33033308  |
| 12(1)        | 1380.420 | 1357.769  | 23.12774867   | 4.19713481   |
| 13(1)        | 1332.541 | 1302.341  | 25.80824698   | 31.75356385  |
| 14(1)        | 1281.673 | 1256.753  | 31.04756064   | 19.95366226  |
| 15(1)        | 1167.437 | 1135.413  | 6.45330986    | 6.07310769   |
| 16(1)        | 1106.278 | 1080.416  | 22.32839105   | 25.42421471  |
| 17(1)        | 1085.120 | 1070.593  | 58.22526985   | 18.11359114  |
| 18(1)        | 1024.635 | 998.115   | 24.83132050   | 40.93440913  |
| 19(1)        | 932.168  | 855.334   | 312.61926954  | 204.76162946 |
| 20(1)        | 892.737  | 875.570   | 6.11573420    | 6.68315498   |
| 21(1)        | 861.696  | 852.155   | 18.49410870   | 16.55339045  |
| 22(1)        | 835.265  | 820.060   | 6.97799864    | 5.34799558   |
| 23(1)        | 644.244  | 634.759   | 17.06445734   | 18.12387869  |
| 24(1)        | 594.725  | 565.636   | 52.93291704   | 39.36631491  |
| 25(1)        | 483.084  | 459.255   | 55.37603093   | 44.93230658  |
| 26(1)        | 438.170  | 430.828   | 17.13492335   | 24.93502229  |
| 27(1)        | 349.326  | 349.650   | 13.43938876   | 1.51816069   |
| 28(1)        | 342.956  | 337.675   | 16.56576676   | 67.37432410  |
| 29(1)        | 292.667  | 291.536   | 6.19750106    | 5.03851633   |
| 30(1)        | 233.439  | 246.429   | 0.75014252    | 0.94823265   |
| 31(1)        | 143.491  | 140.246   | 2.92281473    | 3.19455623   |
| 32(1)        | 78.300   | 85.014    | 4.36114687    | 4.24238145   |
| 33(1)        | 21.239   | 14.622    | 2.57645555    | 3.16711322   |

## fp3

| Mode(Quanta) | E(harm)  | E(anharm) | I(harm)       | I(anharm)    |
|--------------|----------|-----------|---------------|--------------|
| 1(1)         | 3586.411 | 3424.283  | 91.05821098   | 75.02715918  |
| 2(1)         | 3202.795 | 3051.307  | 1.24938673    | 3.25867462   |
| 3(1)         | 3134.210 | 2993.501  | 11.30807419   | 11.98776646  |
| 4(1)         | 3112.637 | 2989.965  | 11.98043818   | 15.00268718  |
| 5(1)         | 3102.072 | 2959.198  | 10.30438583   | 12.24172603  |
| 6(1)         | 3036.267 | 2938.206  | 19.24603174   | 21.41211523  |
| 7(1)         | 2233.284 | 2193.231  | 1035.24556025 | 878.17700968 |
| 8(1)         | 1497.027 | 1455.081  | 1.66431023    | 1.70713286   |
| 9(1)         | 1486.821 | 1448.698  | 5.16130830    | 4.11211158   |
| 10(1)        | 1475.588 | 1442.947  | 6.80809862    | 3.43104984   |
| 11(1)        | 1426.158 | 1390.174  | 47.89765264   | 34.75423613  |
| 12(1)        | 1416.691 | 1384.975  | 2.25813713    | 1.70406279   |
| 13(1)        | 1281.713 | 1253.875  | 16.27037631   | 10.70021636  |
| 14(1)        | 1203.627 | 1178.437  | 46.11435488   | 42.51479085  |
| 15(1)        | 1089.325 | 1067.537  | 25.96646479   | 18.32532389  |
| 16(1)        | 1075.021 | 1052.423  | 11.95049174   | 18.12093921  |
| 17(1)        | 990.354  | 971.929   | 2.22895760    | 2.88509299   |
| 18(1)        | 942.584  | 924.334   | 11.62133781   | 1.10368411   |
| 19(1)        | 924.503  | 902.129   | 51.78676321   | 24.50152174  |
| 20(1)        | 912.914  | 856.268   | 216.63441836  | 275.41154961 |
| 21(1)        | 776.733  | 758.334   | 31.76416883   | 21.00554929  |
| 22(1)        | 656.119  | 643.999   | 26.66957705   | 20.74323281  |

|       |         |         |             |             |
|-------|---------|---------|-------------|-------------|
| 23(1) | 614.493 | 600.363 | 80.71746364 | 28.23643049 |
| 24(1) | 592.826 | 584.527 | 15.25594239 | 17.53523032 |
| 25(1) | 554.067 | 545.826 | 9.01244729  | 16.73787795 |
| 26(1) | 476.447 | 473.718 | 39.01145479 | 29.66709963 |
| 27(1) | 404.748 | 403.905 | 42.79834158 | 40.94867885 |
| 28(1) | 378.878 | 376.973 | 18.24109497 | 12.64289443 |
| 29(1) | 331.277 | 332.945 | 7.61929691  | 10.86161721 |
| 30(1) | 285.792 | 281.789 | 2.61315954  | 2.66948464  |
| 31(1) | 233.340 | 235.042 | 0.14379310  | 0.12193763  |
| 32(1) | 107.313 | 110.650 | 0.91660849  | 0.84469262  |
| 33(1) | 30.605  | 83.837  | 7.96363468  | 0.39470294  |

### fp15 syn/syn

| Mode(Quanta) | E(harm)  | E(anharm) | I(harm)      | I(anharm)    |
|--------------|----------|-----------|--------------|--------------|
| 1(1)         | 3517.919 | 3344.502  | 6.92131525   | 5.55894620   |
| 2(1)         | 3323.701 | 3182.641  | 17.76779502  | 10.39208355  |
| 3(1)         | 3120.606 | 2971.672  | 5.90153928   | 6.16384548   |
| 4(1)         | 3092.985 | 2947.312  | 4.08004477   | 6.33633944   |
| 5(1)         | 3030.177 | 2921.953  | 14.61738334  | 15.31156600  |
| 6(1)         | 2674.950 | 2677.458  | 1.54852413   | 2.25339274   |
| 7(1)         | 1920.295 | 1883.342  | 14.25270041  | 8.29597795   |
| 8(1)         | 1653.080 | 1611.659  | 175.10947089 | 92.46289622  |
| 9(1)         | 1482.674 | 1443.768  | 6.90864083   | 5.19913910   |
| 10(1)        | 1463.080 | 1415.057  | 12.36929973  | 10.43548304  |
| 11(1)        | 1403.126 | 1371.389  | 5.14159717   | 3.75494125   |
| 12(1)        | 1254.591 | 1209.565  | 303.85049520 | 192.15707373 |
| 13(1)        | 1129.866 | 1101.313  | 67.99661556  | 36.30147316  |
| 14(1)        | 1058.942 | 1031.085  | 3.12148380   | 0.70261764   |
| 15(1)        | 1042.335 | 1007.855  | 42.56209892  | 30.32371750  |
| 16(1)        | 1021.789 | 1000.227  | 32.47963517  | 35.69913539  |
| 17(1)        | 944.467  | 942.415   | 1.06782700   | 6.10939912   |
| 18(1)        | 913.546  | 905.929   | 11.24603797  | 3.73134216   |
| 19(1)        | 861.389  | 842.406   | 66.56858964  | 54.03164541  |
| 20(1)        | 840.541  | 820.918   | 57.09248518  | 50.72257135  |
| 21(1)        | 752.991  | 734.956   | 32.72940820  | 32.95334908  |
| 22(1)        | 699.597  | 684.461   | 2.21972356   | 2.09169322   |
| 23(1)        | 648.854  | 614.998   | 36.82731548  | 32.06643528  |
| 24(1)        | 539.981  | 517.412   | 3.61853539   | 3.21360546   |
| 25(1)        | 461.491  | 448.372   | 8.34281395   | 7.95305088   |
| 26(1)        | 408.371  | 404.975   | 2.52017543   | 1.99347825   |
| 27(1)        | 343.988  | 337.629   | 4.01261296   | 3.77262919   |
| 28(1)        | 269.500  | 332.706   | 8.55863733   | 9.37441858   |
| 29(1)        | 250.987  | 243.294   | 21.53645070  | 20.35073767  |
| 30(1)        | 241.384  | 240.583   | 3.62189169   | 3.09188458   |
| 31(1)        | 159.224  | 158.870   | 0.27777371   | 0.39442669   |
| 32(1)        | 136.537  | 140.412   | 4.44372174   | 4.41665632   |
| 33(1)        | 40.668   | 41.816    | 2.31017269   | 2.17909671   |

### fp15 anti/syn

| Mode(Quanta) | E(harm)  | E(anharm) | I(harm)      | I(anharm)    |
|--------------|----------|-----------|--------------|--------------|
| 1(1)         | 3502.456 | 3335.923  | 7.22760934   | 5.40165302   |
| 2(1)         | 3321.282 | 3180.190  | 16.23077049  | 8.23792608   |
| 3(1)         | 3120.462 | 2973.533  | 5.52646810   | 5.67370990   |
| 4(1)         | 3093.446 | 2948.362  | 4.44792305   | 7.00604880   |
| 5(1)         | 3030.230 | 2921.024  | 15.18369620  | 15.64730400  |
| 6(1)         | 2684.213 | 2563.843  | 1.42903826   | 1.60998530   |
| 7(1)         | 1922.881 | 1887.289  | 14.58463265  | 5.45607222   |
| 8(1)         | 1651.704 | 1601.806  | 172.74132478 | 10.83346386  |
| 9(1)         | 1482.962 | 1442.348  | 7.12293457   | 2.26862182   |
| 10(1)        | 1463.379 | 1414.778  | 12.32178430  | 8.11779898   |
| 11(1)        | 1402.490 | 1371.539  | 5.02777113   | 4.32132462   |
| 12(1)        | 1267.681 | 1220.168  | 265.89102885 | 107.28341366 |
| 13(1)        | 1120.095 | 1096.462  | 51.77886020  | 29.84959449  |
| 14(1)        | 1057.704 | 1029.084  | 1.03675825   | 0.87408193   |
| 15(1)        | 1037.330 | 999.126   | 28.33806928  | 10.23399363  |
| 16(1)        | 1021.240 | 996.115   | 54.05345414  | 50.61281439  |
| 17(1)        | 929.315  | 901.434   | 7.32042131   | 6.39014418   |

|       |         |         |             |                |
|-------|---------|---------|-------------|----------------|
| 18(1) | 909.897 | 876.601 | 2.85847447  | 2.34749737     |
| 19(1) | 859.829 | 837.930 | 37.30221365 | 34.66304881    |
| 20(1) | 834.631 | 813.236 | 64.75487786 | 58.17726123    |
| 21(1) | 763.733 | 745.049 | 30.23493746 | 28.45053413    |
| 22(1) | 704.033 | 689.341 | 2.81831379  | 3.09760236     |
| 23(1) | 648.914 | 623.800 | 37.63357673 | 31.89182468    |
| 24(1) | 538.112 | 516.276 | 2.35963184  | 1.87954905     |
| 25(1) | 457.707 | 446.146 | 9.64495531  | 9.93395609     |
| 26(1) | 391.369 | 389.715 | 2.80594451  | 0.65969756     |
| 27(1) | 344.967 | 339.380 | 6.48786424  | 6.35020488     |
| 28(1) | 268.622 | 208.551 | 20.17123780 | 71.77434944    |
| 29(1) | 249.527 | 227.539 | 13.81575919 | 8571.07308194  |
| 30(1) | 246.460 | 213.807 | 6.22307913  | 19668.11335604 |
| 31(1) | 157.716 | 154.311 | 0.30337803  | 0.95479937     |
| 32(1) | 139.958 | 135.240 | 3.95747628  | 3.80577679     |
| 33(1) | 43.481  | 41.044  | 2.19488678  | 2.26648024     |

### fp15 syn/anti

| Mode(Quanta) | E(harm)  | E(anharm) | I(harm)      | I(anharm)    |
|--------------|----------|-----------|--------------|--------------|
| 1(1)         | 3453.415 | 3290.012  | 6.78479518   | 4.21935075   |
| 2(1)         | 3326.080 | 3186.870  | 20.44265269  | 15.77413742  |
| 3(1)         | 3117.367 | 2963.557  | 5.16527972   | 6.78939822   |
| 4(1)         | 3086.953 | 2937.471  | 2.85800925   | 3.31347712   |
| 5(1)         | 3029.617 | 2917.866  | 9.67044689   | 10.16011545  |
| 6(1)         | 2685.581 | 2674.461  | 1.31993165   | 1.10775521   |
| 7(1)         | 1932.464 | 1904.480  | 9.12885354   | 2.73622322   |
| 8(1)         | 1676.859 | 1636.061  | 226.21707617 | 119.69282341 |
| 9(1)         | 1477.720 | 1435.039  | 6.14940331   | 3.34699648   |
| 10(1)        | 1466.725 | 1424.962  | 10.01552701  | 5.27956560   |
| 11(1)        | 1408.346 | 1378.711  | 2.54401467   | 1.67604268   |
| 12(1)        | 1261.882 | 1222.690  | 166.35944150 | 63.96407348  |
| 13(1)        | 1091.820 | 1066.581  | 47.16831405  | 39.19881778  |
| 14(1)        | 1057.433 | 1034.275  | 5.03256371   | 3.21851436   |
| 15(1)        | 1027.269 | 998.133   | 22.35647881  | 16.13005766  |
| 16(1)        | 1015.238 | 982.460   | 26.81162947  | 8.14356328   |
| 17(1)        | 920.353  | 900.705   | 34.35376190  | 7.51036029   |
| 18(1)        | 901.087  | 885.592   | 23.59002938  | 28.84326822  |
| 19(1)        | 889.608  | 864.218   | 53.88052751  | 45.25764015  |
| 20(1)        | 874.287  | 858.827   | 61.22058502  | 79.73285359  |
| 21(1)        | 681.030  | 665.388   | 12.67388208  | 6.64655702   |
| 22(1)        | 669.443  | 652.691   | 57.50431010  | 53.66263210  |
| 23(1)        | 603.658  | 592.954   | 18.37496511  | 16.15401610  |
| 24(1)        | 520.381  | 513.131   | 17.14086653  | 13.38913913  |
| 25(1)        | 480.556  | 458.815   | 0.96509491   | 1.01426382   |
| 26(1)        | 426.347  | 422.663   | 4.12482964   | 1.80978360   |
| 27(1)        | 390.361  | 422.127   | 18.71586605  | 41.83826528  |
| 28(1)        | 359.785  | 384.401   | 10.02244450  | 9.71680901   |
| 29(1)        | 313.813  | 314.545   | 3.93768712   | 4.99622192   |
| 30(1)        | 218.341  | 215.924   | 1.18287583   | 0.95548861   |
| 31(1)        | 154.569  | 118.636   | 0.08415239   | 0.77011807   |
| 32(1)        | 127.748  | 129.864   | 1.79449674   | 1.58379244   |
| 33(1)        | 60.140   | 64.689    | 0.25009239   | 0.27846217   |

### fp25

| Mode(Quanta) | E(harm)  | E(anharm) | I(harm)      | I(anharm)    |
|--------------|----------|-----------|--------------|--------------|
| 1(1)         | 3557.051 | 3376.794  | 66.14187454  | 18.93947281  |
| 2(1)         | 2672.662 | 2685.108  | 0.13780258   | 0.35438356   |
| 3(1)         | 2212.193 | 2162.602  | 900.27581087 | 788.47270947 |
| 4(1)         | 1356.253 | 1367.791  | 0.04381699   | 0.14773980   |
| 5(1)         | 1027.930 | 1028.936  | 15.91445753  | 12.53476176  |
| 6(1)         | 944.969  | 880.123   | 269.13221950 | 226.86249986 |
| 7(1)         | 677.933  | 667.467   | 19.52115846  | 13.95618915  |
| 8(1)         | 603.125  | 586.292   | 58.93044130  | 39.50241631  |
| 9(1)         | 589.450  | 579.274   | 22.75631703  | 43.68113758  |
| 10(1)        | 465.377  | 459.601   | 44.02735748  | 43.56862777  |
| 11(1)        | 195.915  | 313.024   | 17.85182495  | 13.57545402  |

12(1) 176.477 177.960 5.32650460 7.15282244

### fp23

| Mode(Quanta) | E(harm)  | E(anharm) | I(harm)      | I(anharm)     |
|--------------|----------|-----------|--------------|---------------|
| 1(1)         | 3706.472 | 3575.446  | 68.07107671  | 67.43753187   |
| 2(1)         | 3578.221 | 3455.658  | 58.01284153  | 63.13329420   |
| 3(1)         | 1831.312 | 1800.362  | 224.13333213 | 214.13955244  |
| 4(1)         | 1620.427 | 1576.369  | 47.12081906  | 57.58070769   |
| 5(1)         | 1244.695 | 1200.474  | 85.50481242  | 81.04406848   |
| 6(1)         | 1089.723 | 1048.269  | 4.76949525   | 0.49575179    |
| 7(1)         | 681.890  | 666.999   | 13.83711720  | 14.51617098   |
| 8(1)         | 560.583  | 555.878   | 6.43145631   | 8.75743468    |
| 9(1)         | 512.809  | 502.094   | 10.78398790  | 14.18573782   |
| 10(1)        | 392.531  | 401.211   | 8.02284790   | 103.13211815  |
| 11(1)        | 326.806  | 306.196   | 5.34855324   | 562.02952901  |
| 12(1)        | 242.695  | -642.867  | 211.39369430 | 3647.07214783 |

**Table S4.** Electronic energy and CP-corrected energy (in kJ mol<sup>-1</sup>) calculated at B3LYP-D3(BJ) for the structures of complexes obtained after optimization at B3LYP/6-311++G(3df,3pd).

| complex  | $\Delta E$ | $\Delta E^{CP}$ |
|----------|------------|-----------------|
| fp11-12a | -45.9      | -44.4           |
| fp11-12b | -39.8      | -38.3           |
| fp11-13a | -27.9      | -26.9           |
| fp11-13b | -30.9      | -29.9           |
| fp11-14  | -29.8      | -28.7           |
| fp22-25a | -17.7      | -17.0           |
| fp22-25b | -16.2      | -15.4           |

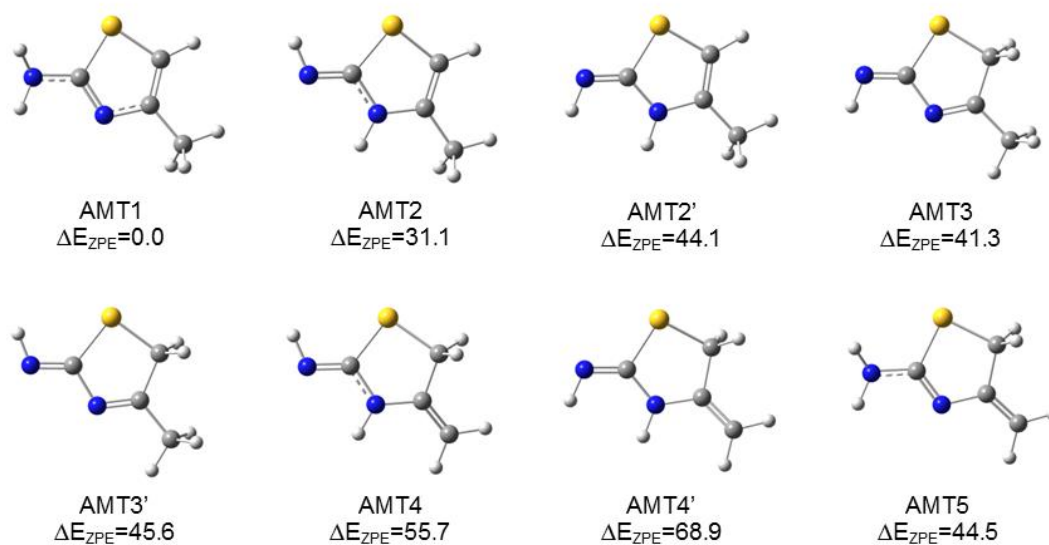

**Figure S1.** B3LYP/6-311++G(3df,3pd) optimized structures of the tautomers of 2-amino-4-methylthiazole.

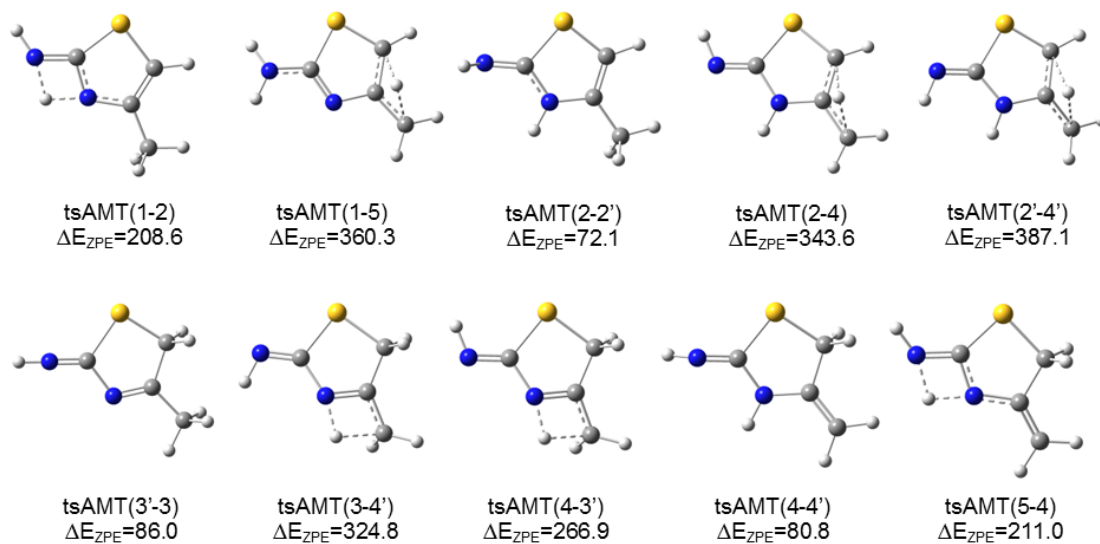

**Figure S2.** B3LYP/6-311++G(3df,3pd) optimized structures of the transition states.



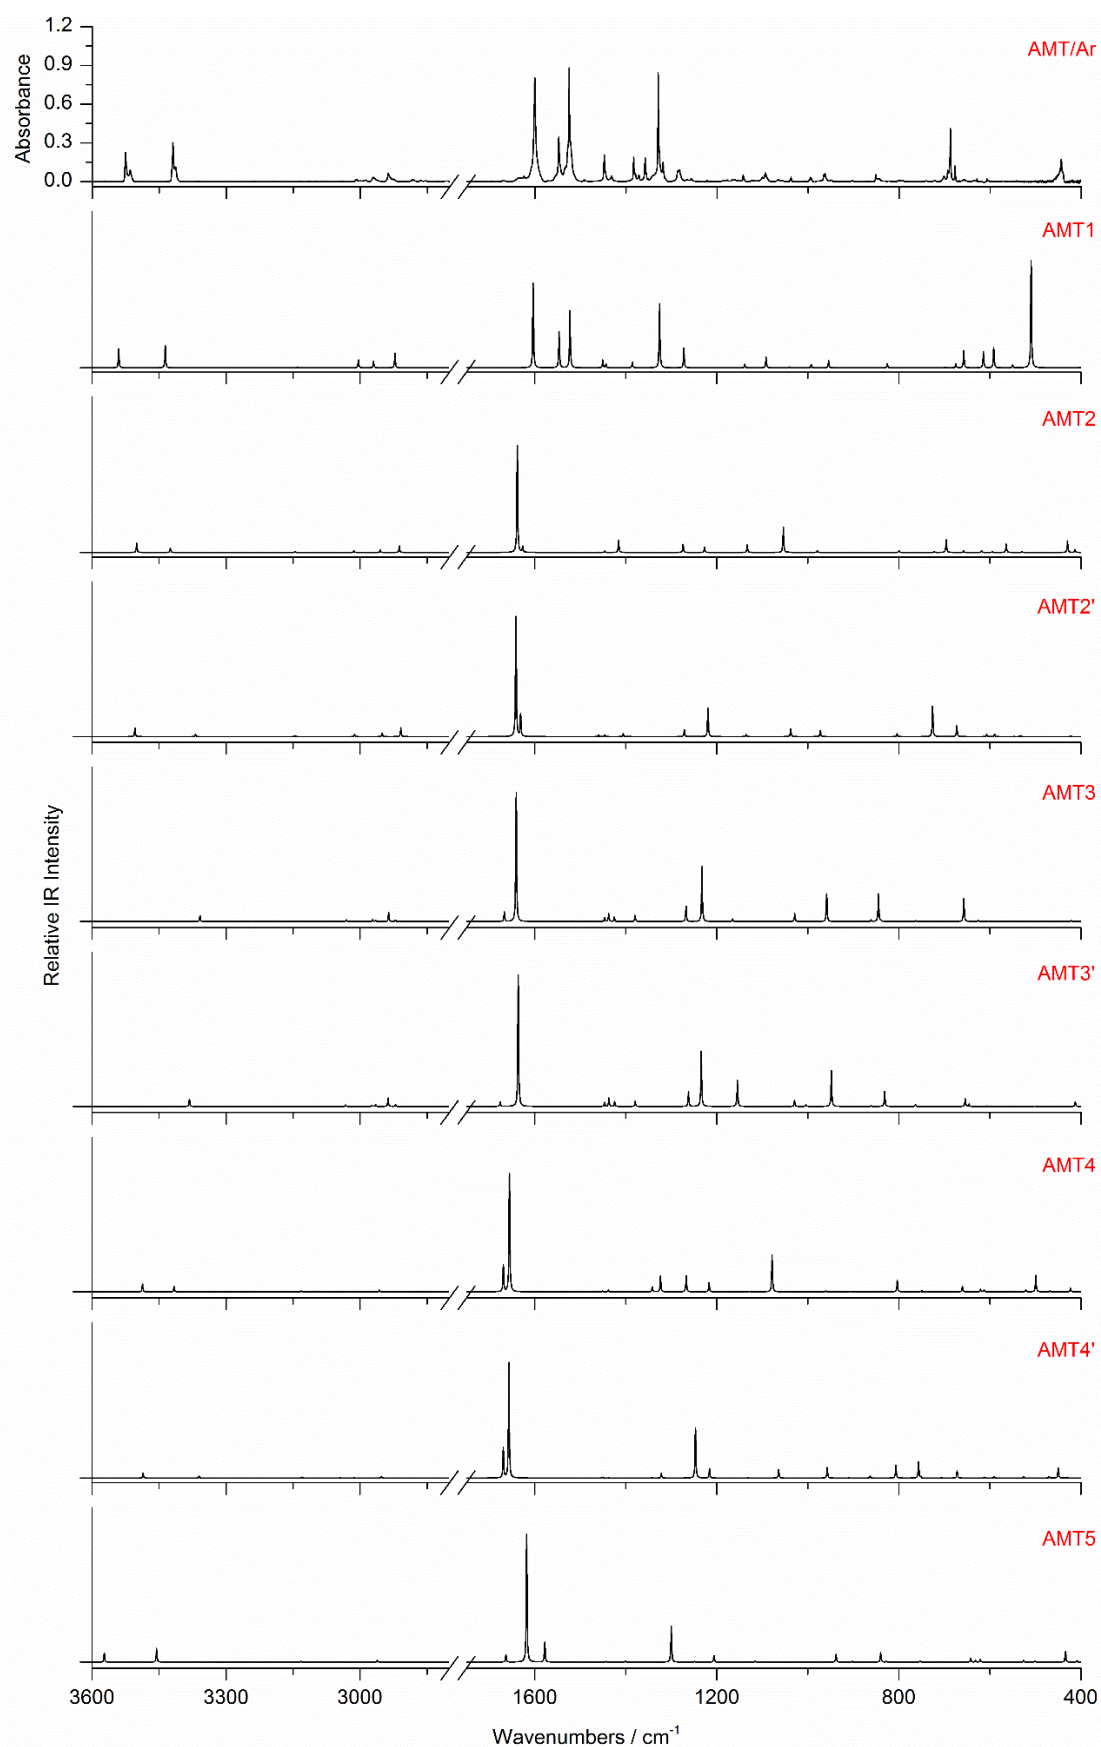

**Figure S3.** Comparison of the AMT/Ar matrix spectrum with the spectra calculated for all the tautomers of AMT molecule at the B3LYP/6-311++G(3df,3pd) level of theory.

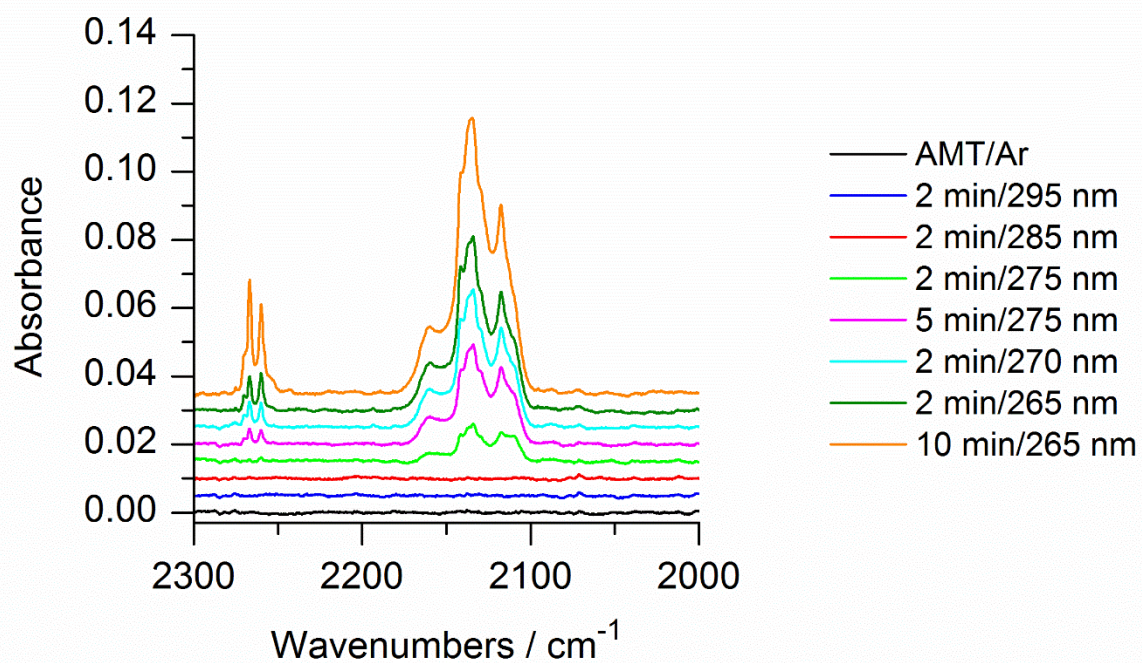

**Figure S4.** The 2300-2000  $\text{cm}^{-1}$  region in the AMT/Ar matrix spectra during irradiation at wavelengths between 295 and 265 nm.



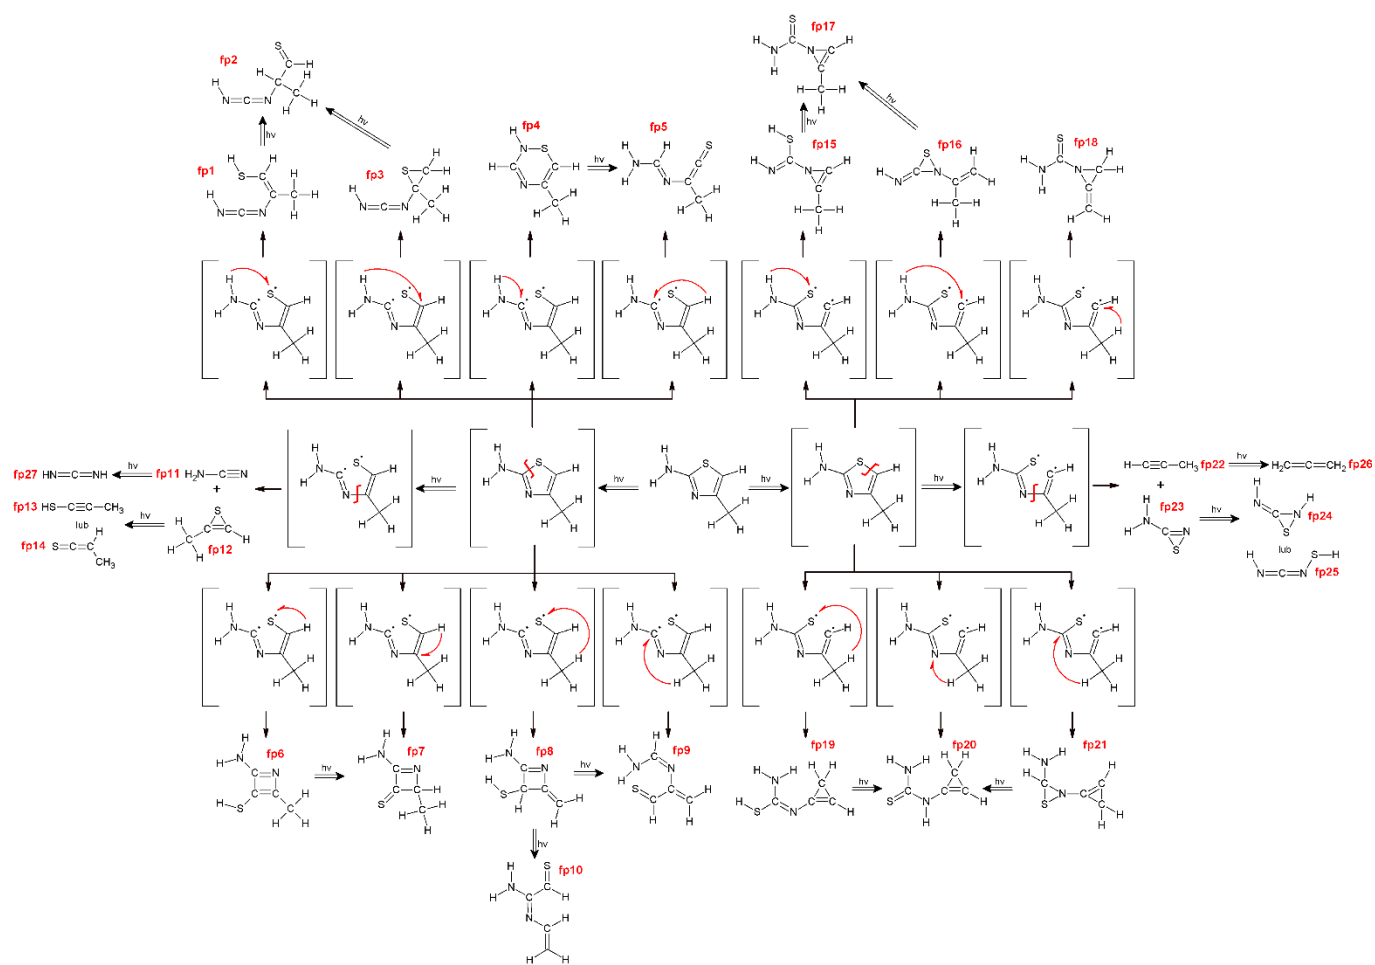

**Figure S5.** Photoreaction pathways of AMT. Part 1.

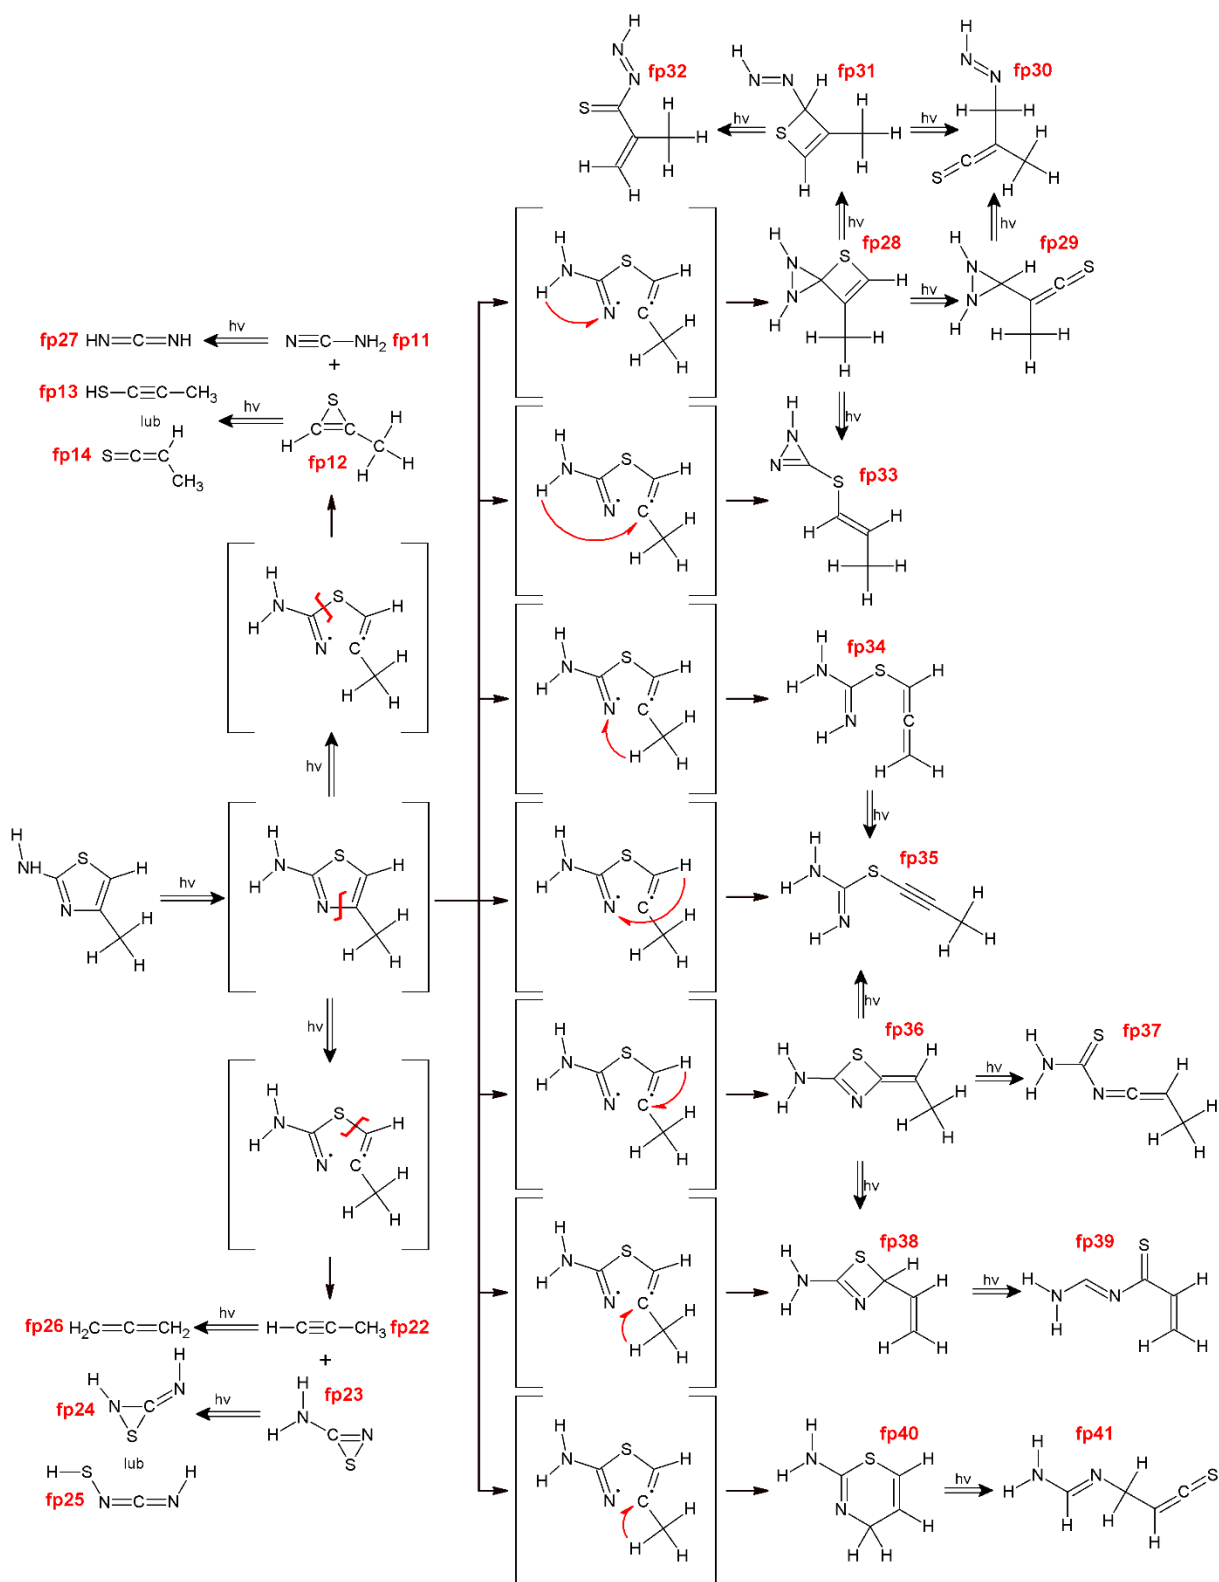

Figure S6. Photoreaction pathways of AMT. Part 2.

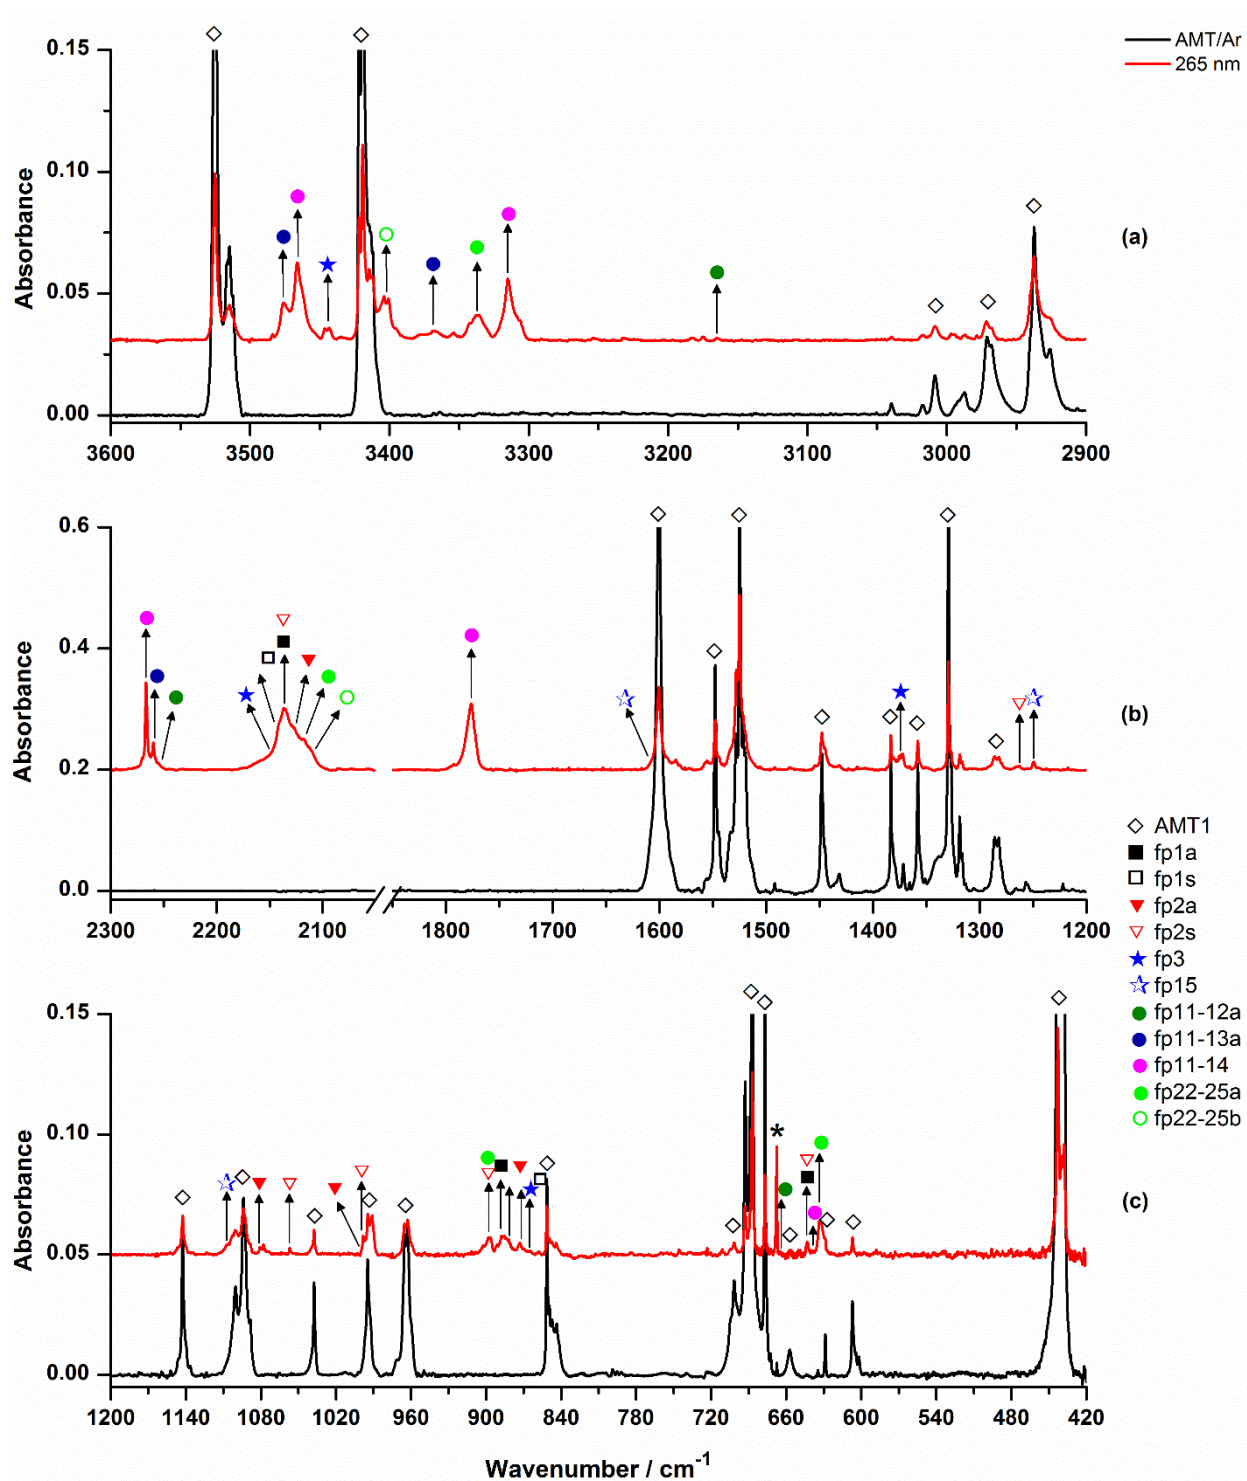

**Figure S7.** 3600-2900  $\text{cm}^{-1}$  (A), 2300-1200  $\text{cm}^{-1}$  (B), 1200-420  $\text{cm}^{-1}$  (C) regions of the spectra of AMT/Ar matrix after deposition (bottom spectra) and after 300 min irradiation at 265 nm of the deposited matrix (upper spectra).

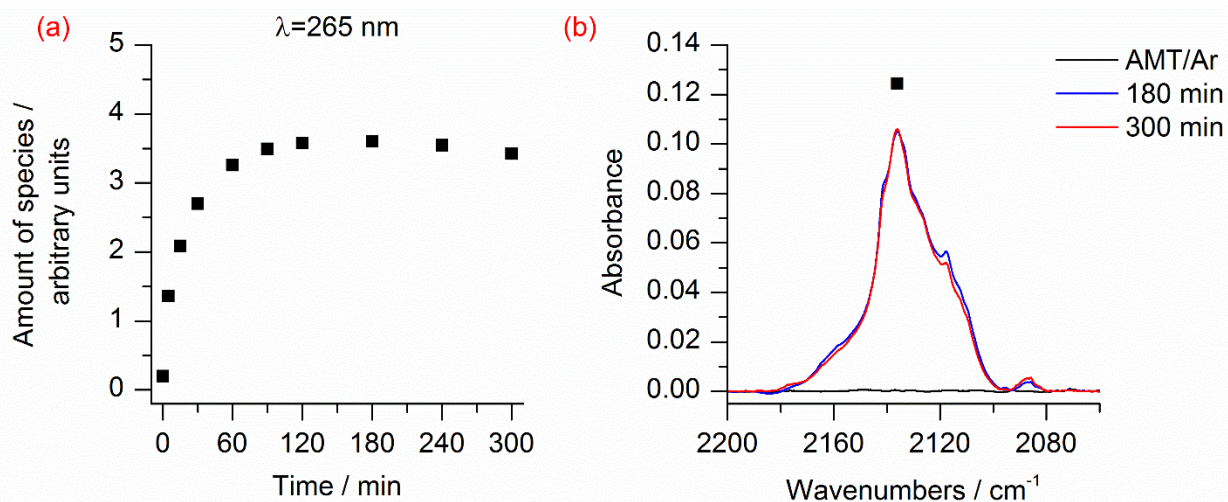

**Figure S8.** The 2135 cm<sup>-1</sup> band in the AMT/Ar matrix spectra during irradiation at 265 nm.
